# Supplementary material
Source: PubMed Central journal article supplement (PMC4780627)
Supplement: pnas.1521325113.sapp.pdf [file pnas.1521325113.sapp.pdf]

**Maher et al., Visualizing the origins of selfish de novo mutations in individual seminiferous tubules  
of human testes**

**Supplementary Appendix**

**Table of Contents**

| <b>Contents</b>   |                                                                               | <b>Page(s)</b> |
|-------------------|-------------------------------------------------------------------------------|----------------|
| SI text - Methods |                                                                               | 2-6            |
| Table S1          | Detailed clinical and genetic data for testis samples included in Table 1     | 7-8            |
| Table S2          | Primer sequences used for mutation screening and dideoxy-sequencing           | 9-10           |
| Table S3          | Testis samples screened for immunopositive tubules with MAGEA4 antibody       | 11-12          |
| Figure S1         | Strategy to identify mutant clones in proof-of-principle study                | 13             |
| Figure S2         | Analysis of Testis 1-1                                                        | 14             |
| Figure S3         | Analysis of Testis 2-1                                                        | 15             |
| Figure S4         | Analysis of Testis 3-1                                                        | 16             |
| Figure S5         | Analysis of Testis 7-1                                                        | 17             |
| Figure S6         | Triplicate strategy to identify mutant clones in main study                   | 18             |
| Figure S7         | Analysis of tubule clusters A and B in Testis 8-E                             | 19             |
| Figure S8         | Analysis of Testis 10-F                                                       | 20             |
| Figure S9         | Analysis of tubule clusters A and B in Testis 13-G                            | 21             |
| Figure S10        | Analysis of Testis 12-E                                                       | 22             |
| Figure S11        | Analysis of Testis 15-B                                                       | 23             |
| Figure S12        | Analysis of tubule clusters A and B in Testis 16-D                            | 24             |
| Figure S13        | Analysis of Testis 9-L2C                                                      | 25             |
| Figure S14        | Analysis of Testis 11-H                                                       | 26             |
| Figure S15        | Analysis of Testis 14-D                                                       | 27             |
| Figure S16        | Analysis of Testis 12-H                                                       | 28             |
| Figure S17        | Analysis of spermatogenesis in immunopositive and neighbouring normal tubules | 29             |
| Figure S18        | Analysis of Testis 17-2E                                                      | 30             |
|                   |                                                                               |                |

## **SI Text**

### **Methods**

#### **Testis samples**

Sections or blocks of formalin-fixed paraffin-embedded (FFPE) non-malignant testes removed from anonymized patients for reasons of coincidental pathology were acquired from the Department of Cellular Pathology/Oxford Centre for Histopathology Research (OCHRe), John Radcliffe Hospital, Oxford, UK, as previously described<sup>1</sup>. All patients had given informed written consent for research use and ethical approval was provided by the Oxfordshire Research Ethics Committee A (C03.076: Receptor tyrosine kinases and germ cell development: detection of mutations in normal testis, testicular tumors and sperm). The age of the donor at the time of surgery and clinical reason for orchidectomy was documented (Tables 1, S1 and S3). For the subset of testes that were processed for microdissection, a haematoxylin and eosin (H&E) stained section adjacent to those used for staining and microdissection was analyzed by a pathologist to determine any relevant pathology. Spermatogenesis of the immunopositive tubular cross-sections that were sequenced, as well as three neighboring tubular cross-sections with a normal MAGEA4 appearance, was scored, blinded to immunopositive status, using Johnsen's criteria<sup>2</sup> (Fig. 3 and Fig. S17) as presented in Table 1, Table S1 and Figs. S2-S5, S7-S16, S18.

#### **Immunohistochemical screening**

Staining of Testes 1-1, 2-1 and 3-1 has previously been reported<sup>1</sup>. For Testes 2-1 and 3-1, the regions previously analyzed included 4 sections on 1.0 polyethylene naphthalate (PEN) membrane slides (Zeiss) that were used for DNA analysis in this study. For Testis 1-1 a further 56 sections of 5  $\mu$ m were obtained from the same FFPE tissue block, 16 of which were placed on PEN membrane slides, which had been pre-treated under UV light for 30 minutes. For all other testes, initially, one to two 5  $\mu$ m sections from each FFPE block (Table S3) were stained using a MAGEA4 antibody (clone 57B, a kind gift from Prof. Giulio C. Spagnoli) using methods previously described<sup>1</sup>. A further 20 (for Testis

7-1) or 30-35 (for Testes 8-E to 17-2E) consecutive 5  $\mu\text{m}$  sections were obtained from each FFPE tissue block in which immunopositive tubules (i.e. tubular cross-sections with a darker appearance due to stronger staining and/or the presence of additional cells) were identified. Four (Testis 7-1) or twelve (Testes 8-E to 17-2E) sections were placed on UV-treated 1.0 PEN membrane slides and the remainder mounted on adhesive glass microscope slides. All slides were stored at 4°C until use. Immunohistochemistry was performed with antibodies to MAGEA4 (clone 57-B) (every 4-6 slides), FGFR3 (clone C-15, Santa Cruz Biotechnology) (single slide) and pAKT (clone 736E11, Cell Signaling Technology) (single slide) using the EnVision detection system (Dako) as previously described<sup>12</sup> or using the EXPOSE detection IHC kit (AbCam) following the manufacturer's instructions. Stained sections were digitally scanned at 20x magnification using either a dotSlide digital virtual microscope (Olympus) analyzed using the viewer software OlyVIA-Viewer (Olympus), or a NanoZoomer 2.0-HT slide scanner (Hamamatsu) analyzed using NDP.view2 (Hamamatsu). Details of the order of stained and microdissected (LCM) sections for each testis are presented in Figs. S2-S5, S7-S16, S18.

#### **Laser capture microdissection and DNA extraction**

In the proof-of-principle (PoP) study (Testes 1-1, 2-1, 3-1, 7-1) (Fig. S1), one to four neighboring cross-sections of tubules from 3 distinct regions (>2 mm apart) were isolated from a single methyl green-stained section into individual adhesive cap tubes (Zeiss) using a PALM laser capture MicroBeam microscope (Zeiss). For the main study (Testes 8-E to 17-2E) (Fig. S6) clusters of tubular cross-sections from the same region of two adjacent slides were pooled into a single adhesive cap tube. This was performed on six slides in total, generating three biological replicates for each cluster. DNA was extracted from each replicate independently using 10  $\mu\text{l}$  Arcturus PicoPure DNA extraction solution (Life Technologies) and whole genome amplified (WGA) using a GenomePlex single cell WGA kit (WGA4, Sigma Aldrich), omitting the initial fragmentation step (which was deemed unnecessary due to the fragmented nature of the formalin-fixed DNA). Negative ( $\text{H}_2\text{O}$ ; PicoPure DNA extraction solution) and positive (gDNA) controls were included in each WGA procedure. Amplified

products were purified using a GenElute™ PCR CleanUp Kit (Sigma Aldrich). Further replicates were microdissected and extracted as above, but did not undergo WGA, to use for direct sequence validation. DNA was extracted from 3 x 5 µm whole sections using QIAamp DNA FFPE Tissue Kit (Qiagen) for use as constitutional DNA.

### **Targeted sequencing and variant calling**

For the PoP study, 200 ng of HaloPlex Enrichment Control DNA (Agilent Technologies) or approximately 2 µg of WGA DNA were used as template DNA. For the main study approximately 1 µg of FFPE (constitutional) DNA or 2 µg of WGA DNA were used as template DNA. Targeted regions of the genome (Dataset S1) were captured and amplified with unique sample indices/barcodes (BC) using a HaloPlex custom design panel (Agilent Technologies) following the manufacturer's instructions. Equimolar ratios of the indexed WGA samples (and approximately half of the concentration of the control/constitutional samples) were pooled in groups of 13 to 19 samples and sequenced on one lane of the HiSeq 2000 platform (Illumina) using 2x100 paired-end reads (4 lanes in total were processed). 87.4% of target regions (range 53.2% - 95.6%) had a minimum median coverage of 20x in the WGA samples; 98.6% of target regions (range 98.0% - 99.1%) had a minimum median coverage of 20x in the whole section DNA samples (Dataset S1). 3' primer and adapter sequences were removed using Cutadapt<sup>3</sup>. 5' restriction enzyme footprints were removed by trimming the first 5 bases from all reads. For captured fragments shorter than 100 bases, 3' restriction enzyme footprints were also removed by trimming the last 5 bases using a custom script. Trimmed reads were aligned to hg19 genome build using NovoAlign version 3.01.00. For the PoP study (Testes 1-1, 2-1, 3-1, 7-1), single nucleotide variants (SNVs) and indels in the WGA tubular cross sections were identified by comparing variant calls to those in control DNA using VarScan version 2.3.6<sup>4</sup> (variant frequencies  $\geq 0.15$  in WGA tubular DNA,  $< 0.01$  in control DNA; minimum coverage of 20 reads). Variants were annotated using ANNOVAR version 2014Nov12<sup>5</sup> and common SNPs (frequency  $\geq 0.001$  in ESP6500 (National Heart, Lung and Blood Institute [NHLBI] GO Exome



Sequencing Project)<sup>6</sup> or 1000 Genomes Project<sup>7</sup>) were removed. For the main study (Testes 8E to 16-D), SNVs and indels specific to the WGA cross-sections were identified by comparing variant frequencies with matched constitutional DNA using VarScan version 2.3.6 (variant frequencies  $\geq 0.10$  in WGA DNA;  $< 0.01$  in matched constitutional DNA; minimum coverage of 5 reads; minimum variant reads of 2). Variants were annotated using ANNOVAR version 2014Nov12. Subsequently, variants common to all three replicates were prioritized for validation. When triplicate variants were not identified or validated using the experimental outline (Fig. S6), candidate variants present in one or two replicates were prioritized using the experimental outline below, based on known disease association<sup>8</sup> or cancer association<sup>9</sup>. The number of the variants called for each tubule cluster are presented in Figs. S2-S5, S7-S16, S18.

Screening of two regions of *FGFR3* that were poorly covered by HaloPlex (Dataset S1) was performed by PCR using template-specific primers (Table S2) with common sequence (CS) tails on the same WGA samples processed by HaloPlex. The amplified regions were indexed and Ion PGM adapter sequences added by PCR using Access Array Barcode Library primers (Fluidigm). Indexed PCR products were pooled in equimolar ratios and sequenced to a minimum coverage of 20x using Ion PGM sequencing following the manufacturer's instructions (Life Technologies). To screen the ischemic testis (17-2E) for known PAE mutations, nine regions across *FGFR2* (2), *FGFR3* (2), *RET* (2), *PTPN11* (1) and *HRAS* (2) were amplified by PCR using template-specific primers (Table S2) with common sequence (CS) tails, indexed and sequenced on Ion PGM. Variants present at frequencies  $\geq 0.15$  in WGA tubular DNA were called using Ion Torrent variantCaller.

### **Variant validation**

To validate candidate variants identified by the HaloPlex and PGM screens, non-WGA DNA from the same tubule on adjacent sections was amplified by PCR (Table S2) and dideoxy-sequenced. For some candidate variants that had the appearance of alignment errors, DNA from the same sample that

underwent HaloPlex capture was amplified by PCR and dideoxy-sequenced. Details of genetic analysis for each testis are presented in Figs. S2-S5, S7-S16, S18.

#### Accession codes

Genbank: *FGFR2* cDNA, NM\_000141; *FGFR3* cDNA, NM\_000142; *HRAS* cDNA, NM\_005343; *KRAS* cDNA, NM\_004985; *PTPN11* cDNA, NM\_002834. cDNA numbering is given relative to the A (= 1) of the ATG initiation codon.

#### URLs

COSMIC: <http://cancer.sanger.ac.uk/cosmic/>

ESP6500: <http://evs.gs.washington.edu/EVS/>

OMIM: <http://omim.org/>

#### Supplementary References

1. Lim J, *et al.* (2012) Selfish spermatogonial selection: evidence from an immunohistochemical screen in testes of elderly men. *PLoS One* 7:e42382.
2. Johnsen SG (1970) Testicular biopsy score count - a method for registration of spermatogenesis in human testes: normal values and results in 335 hypogonadal males. *Hormones* 1:2-25.
3. Martin M (2011) Cutadapt removes adapter sequences from high-throughput sequencing reads. *EMBnet.Journal* 17:10-12.
4. Koboldt DC, *et al.* (2012) VarScan 2: somatic mutation and copy number alteration discovery in cancer by exome sequencing. *Genome Res.* 22:568-576.
5. Wang K, Li M, Hakonarson H (2010) ANNOVAR: Functional annotation of genetic variants from next-generation sequencing data. *Nucleic Acids Res.* 38:e164.
6. Exome Variant Server, NHLBI GO Exome Sequencing Project (ESP), Seattle, WA. (Accessed at <http://evs.gs.washington.edu/EVS/>.)
7. Abecasis GR, *et al.* (2012) An integrated map of genetic variation from 1,092 human genomes. *Nature* 491:56-65.
8. Goriely A, Wilkie AOM (2012) Paternal age effect mutations and selfish spermatogonial selection: causes and consequences for human disease. *Am. J. Hum. Genet.* 90:175-200.
9. Forbes SA, *et al.* (2015) COSMIC: exploring the world's knowledge of somatic mutations in human cancer. *Nucleic Acids Res.* 43(D1):D805-D811.

**Table S1.** Detailed clinical and genetic data for testis samples included in Table 1.

| Sample ID    | Age (yrs) | Reason for orchidectomy                                                | Pathology report for sections analyzed                                                                                                    | Tubule cluster ID | Johnsen score for immune-positive tubule cluster <sup>a</sup> | Johnsen score in neighboring normal tubules <sup>a</sup> | Number of target genes | Constitutional DNA sequenced | Variants identified in all replicates using HaloPlex | Variants identified in candidate screen | Germline Disorder ( <sup>d</sup> = perinatal lethal) | OMIM reference number <sup>e</sup> | Reference for germline mutation      | Somatic mutation (COSMIC ID) <sup>f</sup>       | Somatic mutation (tissue distribution in COSMIC v67)                                                                                                                       |    |
|--------------|-----------|------------------------------------------------------------------------|-------------------------------------------------------------------------------------------------------------------------------------------|-------------------|---------------------------------------------------------------|----------------------------------------------------------|------------------------|------------------------------|------------------------------------------------------|-----------------------------------------|------------------------------------------------------|------------------------------------|--------------------------------------|-------------------------------------------------|----------------------------------------------------------------------------------------------------------------------------------------------------------------------------|----|
| Testis 1-1   | 71        | Prostate cancer                                                        | Normal                                                                                                                                    | 2                 | 8                                                             | 9                                                        | 107                    | Y <sup>c</sup>               | <i>FGFR2</i> c.1024T>A (p.C342S)                     | NA                                      | Crouzon/Pfeiffer syndrome                            | 123500 / 101600                    | Tartaglia et al., 1997 <sup>18</sup> | No                                              | No                                                                                                                                                                         |    |
|              |           |                                                                        |                                                                                                                                           | 6                 | 6                                                             | 9                                                        | 107                    | Y <sup>c</sup>               | <i>FGFR2</i> c.1024T>A (p.C342S)                     | NA                                      |                                                      |                                    |                                      |                                                 |                                                                                                                                                                            |    |
| Testis 2-1   | 75        | Infected haematoma after excision of a benign epididymal cyst          | Normal                                                                                                                                    | 7                 | 9                                                             | 9                                                        | 107                    | N                            | -                                                    | <i>FGFR3</i> c.1118A>G (p.Y373C)        | Thanatophoric dysplasia type I <sup>d</sup>          | 187600                             | Rousseau et al., 1996 <sup>23</sup>  | COSM718; COSM1666838                            | urinary tract (n=396), skin (n=16), haematopoietic and lymphoid (n=8)                                                                                                      |    |
|              |           |                                                                        |                                                                                                                                           | 11                | 4.33                                                          | 10                                                       | 107                    | N                            | -                                                    | <i>FGFR3</i> c.1118A>G (p.Y373C)        |                                                      |                                    |                                      |                                                 |                                                                                                                                                                            |    |
|              |           |                                                                        |                                                                                                                                           | 13                | 3                                                             | 10                                                       | 107                    | N                            | -                                                    | NA                                      | NA                                                   | NA                                 | NA                                   | NA                                              | NA                                                                                                                                                                         | NA |
| Testis 3-1   | 78        | Inguinal hernia and transurethral resection of prostate                | Edema, haemorrhage, mild chronic inflammation, focal atrophy and Leydig cell hyperplasia.                                                 | 8                 | 4                                                             | 9                                                        | 107                    | N                            | -                                                    | NA                                      | NA                                                   | NA                                 | NA                                   | NA                                              | NA                                                                                                                                                                         | NA |
|              |           |                                                                        |                                                                                                                                           | 12                | 4                                                             | 9                                                        | 107                    | N                            | -                                                    | <i>HRAS</i> c.37G>C (p.G13R)            | None reported                                        | NA                                 | NA                                   | COSM486; COSM99938                              | skin (n=28), thyroid (n=15), upper aerodigestive tract (n=8), urinary tract (n=8), prostate (n=3), salivary gland (n=3), soft issue (n=3), adrenal gland (n=2), lung (n=2) |    |
|              |           |                                                                        |                                                                                                                                           | 20                | 4                                                             | 6                                                        | 107                    | N                            | -                                                    | <i>HRAS</i> c.37G>C (p.G13R)            |                                                      |                                    |                                      |                                                 |                                                                                                                                                                            |    |
| Testis 7-1   | 70        | Recurrent inguinal hernia repair. Wound sepsis. Necrotising infection. | Mild atrophy with seminiferous tubule basement membrane thickening, minimal focal chronic inflammation and minor Leydig cell hyperplasia. | 1                 | 5                                                             | 4                                                        | 107                    | N                            | -                                                    | NA                                      | NA                                                   | NA                                 | NA                                   | NA                                              | NA                                                                                                                                                                         | NA |
|              |           |                                                                        |                                                                                                                                           | 4                 | 4                                                             | 8                                                        | 107                    | N                            | -                                                    | NA                                      | NA                                                   | NA                                 | NA                                   | NA                                              | NA                                                                                                                                                                         | NA |
|              |           |                                                                        |                                                                                                                                           | 7                 | 5                                                             | 9                                                        | 107                    | N                            | -                                                    | NA                                      | NA                                                   | NA                                 | NA                                   | NA                                              | NA                                                                                                                                                                         | NA |
| Testis 8-E   | 39        | Hernia                                                                 | Mild edema, otherwise normal                                                                                                              | A (x3)            | 9                                                             | 10                                                       | 135                    | Y                            | <i>FGFR2</i> c.758C>G (p.P253R)                      | NA                                      | Apert syndrome                                       | 101200                             | Wilkie et al., 1995 <sup>17</sup>    | COSM1152152 ; COSM915504; COSM49170; COSM915505 | endometrium (n=5), Ovary (n=1), Lung (n=1)                                                                                                                                 |    |
|              |           |                                                                        |                                                                                                                                           | B (x3)            | 9.33                                                          | 9                                                        | 135                    | Y                            | <i>PTPN11</i> c.215C>T (p.A72V)                      | NA                                      | None reported                                        | NA                                 | NA                                   | COSM13015                                       | haematopoietic and lymphoid tissue (n=42)                                                                                                                                  |    |
| Testis 9-L2C | 62        | Prostate cancer                                                        | Edema, otherwise normal                                                                                                                   | A (x3)            | 5.33                                                          | 9                                                        | 135                    | Y                            | -                                                    | <i>PTPN11</i> c.181G>T (p.D61Y)         | None reported                                        | NA                                 | NA                                   | COSM13011                                       | haematopoietic and lymphoid tissue (n=33), (large intestine (n=1), autonomic ganglia (n=1)                                                                                 |    |
| Testis 10-F  | 63        | Inguinal hernia                                                        | Normal                                                                                                                                    | B (x3)            | 9.33                                                          | 9.67                                                     | 135                    | Y                            | <i>FGFR2</i> c.1019A>G (p.Y340C)                     | NA                                      | Pfeiffer syndrome <sup>d</sup>                       | 101600                             | Khonsari et al., 2012 <sup>20</sup>  | None reported                                   | None reported                                                                                                                                                              |    |
| Testis 11-H  | 70        | None provided                                                          | Normal                                                                                                                                    | A (x3)            | 5.67                                                          | 8                                                        | 135                    | Y                            | -                                                    | <i>FGFR2</i> c.1019A>G (p.Y340C)        | Pfeiffer syndrome <sup>d</sup>                       | 101600                             | Khonsari et al., 2012 <sup>20</sup>  | None reported                                   | None reported                                                                                                                                                              |    |

|              |    |                       |                                                                                                   |        |      |      |                |   |                                 |                                  |                                              |        |                                      |                       |                                                                                                                                                                                                                                                           |
|--------------|----|-----------------------|---------------------------------------------------------------------------------------------------|--------|------|------|----------------|---|---------------------------------|----------------------------------|----------------------------------------------|--------|--------------------------------------|-----------------------|-----------------------------------------------------------------------------------------------------------------------------------------------------------------------------------------------------------------------------------------------------------|
| Testis 12-E  | 71 | Inguinal hernia       | Normal                                                                                            | A (x3) | 5    | 8    | 135            | Y | <i>KRAS</i> c.182A>G (p.Q61R)   | NA                               | None reported                                | NA     | NA                                   | COSM1158660 ; COSM552 | large intestine (n=27), lung (n=10), pancreas (n=9), thyroid (n=9), haematopoietic and lymphoid tissue (n=3), stomach (n=2), cervix (n=1), central nervous system (n=1), genital_tract (n=1), prostate (n=1), skin (n=1), upper aerodigestive tract (n=1) |
| Testis 12-H  |    |                       | Focal Leydig cell hyperplasia, otherwise normal                                                   | A (x3) | 6.5  | 9.67 | 135            | Y | -                               | NA                               | NA                                           | NA     | NA                                   | NA                    | NA                                                                                                                                                                                                                                                        |
| Testis 13-G  | 72 | Cystic spermatic cord | Normal                                                                                            | A (x3) | 4    | 10   | 135            | Y | <i>PTPN11</i> c.215C>T (p.A72V) | NA                               | None reported                                | NA     | NA                                   | COSM13015             | haematopoietic and lymphoid tissue (n=42)                                                                                                                                                                                                                 |
|              |    |                       |                                                                                                   | B (x3) | 8    | 10   | 135            | Y | <i>FGFR3</i> c.742C>T (p.R248C) | NA                               | Thanatophoric dysplasia type I <sup>d</sup>  | 187600 | Tavormina et al., 1995 <sup>22</sup> | COSM714; COSM1133721  | urinary_tract (n=165), skin (n=65), haematopoietic and lymphoid tissue (n=2), lung (n=1), upper aerodigestive tract (n=1)                                                                                                                                 |
| Testis 14-D  | 80 | Inguinal hernia       | Normal                                                                                            | A (x3) | 4.33 | 7    | 135            | Y | -                               | <i>KRAS</i> c.182A>G (p.Q61R)    | None reported                                | NA     | NA                                   | COSM1158660 ; COSM552 | large intestine (n=27), lung (n=10), pancreas (n=9), thyroid (n=9), haematopoietic and lymphoid tissue (n=3), stomach (n=2), cervix (n=1), central nervous system (n=1), genital_tract (n=1), prostate (n=1), skin (n=1), upper aerodigestive tract (n=1) |
| Testis 15-B  | 80 | Inguinal hernia       | Areas of marked atrophy with completely atrophic seminiferous tubules, Leydig cell hyperplasia    | A (x3) | 8    | 10   | 135            | Y | <i>KRAS</i> c.182A>G (p.Q61R)   | NA                               | None reported                                | NA     | NA                                   | COSM1158660 ; COSM552 | large intestine (n=27), lung (n=10), pancreas (n=9), thyroid (n=9), haematopoietic and lymphoid tissue (n=3), stomach (n=2), cervix (n=1), central nervous system (n=1), genital_tract (n=1), prostate (n=1), skin (n=1), upper aerodigestive tract (n=1) |
| Testis 16-D  | 87 | Inguinal hernia       | Normal                                                                                            | A (x3) | 5    | 8.33 | 135            | Y | -                               | <i>FGFR3</i> c.1948A>G (p.K650E) | Thanatophoric dysplasia type II <sup>d</sup> | 187601 | Tavormina et al., 1995 <sup>22</sup> | COSM719               | urinary tract (n=23), skin (n=12), haematopoietic and lymphoid tissue (n=7), testis (n=2), central nervous system (n=1)                                                                                                                                   |
|              |    |                       |                                                                                                   | B (x3) | 3.67 | 7.33 | 135            | Y | <i>FGFR2</i> c.870G>T (p.W290C) | NA                               | Pfeiffer syndrome                            | 101600 | Schaefer et al. 1998 <sup>19</sup>   | COSM1346285           | large intestine (n=1)                                                                                                                                                                                                                                     |
| Testis 17-2E | 90 | Inguinal hernia       | Poorly preserved tubular epithelium. Severe atrophy of seminiferous tubules. Vascular congestion. | A (x3) | 3.33 | 8    | 5 <sup>b</sup> | N | -                               | <i>FGFR3</i> c.1948A>G (p.K650E) | Thanatophoric dysplasia type II <sup>d</sup> | 187601 | Tavormina et al., 1995 <sup>22</sup> | COSM719               | urinary tract (n=23), skin (n=12), haematopoietic and lymphoid tissue (n=7), testis (n=2), central nervous system (n=1)                                                                                                                                   |

a = Johnsen scores<sup>39</sup> range between 1 (no seminiferous epithelium) and 10 (full spermatogenesis). b = targeted hotspots only (Table S2). c = DNA from normal tubule that underwent WGA. d = perinatal lethal. e = accessible at <http://omim.org/>; f = accessible at <http://cancer.sanger.ac.uk/cosmic/>. Reference numbering in this Table follows the main text

**Table S2.** Primer sequences used for mutation screening and dideoxy-sequencing

| Primer sequences used for Ion PGM screen of low coverage regions of <i>FGFR3</i> |           |                                                |                                                                                        |                                                              |                                                        |                                               |                  |      |      |  |
|----------------------------------------------------------------------------------|-----------|------------------------------------------------|----------------------------------------------------------------------------------------|--------------------------------------------------------------|--------------------------------------------------------|-----------------------------------------------|------------------|------|------|--|
| Gene                                                                             | Exon      | Genomic co-ordinates of targeted region (hg19) | Codons queried                                                                         | Forward primer sequence 5' to 3' [CS1 tail underlined]       | Reverse primer sequence 5' to 3' [CS2 tail underlined] | common tails used for secondary amplification | Target size (bp) | Tm   | DMSO |  |
| <i>FGFR3</i>                                                                     | 7         | chr4:1803532-1803684                           | p.R248; p.S249; p.P250;                                                                | <u>ACACTGACGACATGGTTCTAC</u> AGTGCCCTGAGCGTCATCT             | TACGGTAGCAGAGACTTGGTCTGCCACTGGATGTGGGGCTGT             | CS1/2                                         | 153              | 60°C | 0    |  |
| <i>FGFR3</i>                                                                     | 15        | chr4:1807829-1807954                           | p.K650                                                                                 | <u>ACACTGACGACATGGTTCTAC</u> AGTGATGAAGATCGCAGACTTCGGGCTG    | TACGGTAGCAGAGACTTGGTCTGCCAGGCGTCTACTGGCATGA            | CS1/2                                         | 126              | 60°C | 5%   |  |
| Primer sequences used for Ion PGM screen (37 PAE hotspots)                       |           |                                                |                                                                                        |                                                              |                                                        |                                               |                  |      |      |  |
| Gene                                                                             | Exon      | Genomic co-ordinates of targeted region (hg19) | Codons queried                                                                         | Forward primer sequence 5' to 3' [CS1 tail underlined]       | Reverse primer sequence 5' to 3' [CS2 tail underlined] | common tails used for secondary amplification | Target size (bp) | Tm   | DMSO |  |
| <i>FGFR2</i>                                                                     | 8 (IIIa)  | chr10:123279572-123279736                      | p.S252; p.P253                                                                         | <u>ACACTGACGACATGGTTCTACA</u> TTGGTCTCTATTCTCCCATC<br>CCCCTC | TACGGTAGCAGAGACTTGGTCTTGGGGCTGGGCATCACTGTA AAC         | CS1/2                                         | 165              | 66°C | 0    |  |
| <i>FGFR2</i>                                                                     | 10 (IIIc) | chr10:123276833-123276963                      | p.Y328; p.N331; p.D336; p.A337; p.G338; p.Y340; p.T341; p.C342; p.A344; p.S347; p.S351 | <u>ACACTGACGACATGGTTCTACA</u> CACCACGGACAAGAGATTGAGGTTT      | TACGGTAGCAGAGACTTGGTCTTGGCAGAAGTCAACCATGCAG            | CS1/2                                         | 131              | 66°C | 0    |  |
| <i>FGFR3</i>                                                                     | 10        | chr4:1806034-1806163                           | p.E368; p.G370; p.S371; p.Y373; p.G375; p.G380; p.V381                                 | <u>ACACTGACGACATGGTTCTACA</u> CCTCAACGCCATGTCTTTG<br>C       | TACGGTAGCAGAGACTTGGTCTCGTCACAGCCGCCACCA                | CS1/2                                         | 130              | 60°C | 0    |  |
| <i>FGFR3</i>                                                                     | 15        | chr4:1807829-1807954                           | p.D641; p. K650                                                                        | <u>ACACTGACGACATGGTTCTACA</u> GTGATGAAGATCGCAGACTTCGGGCTG    | TACGGTAGCAGAGACTTGGTCTGCCAGGCGTCTACTGGCATGA            | CS1/2                                         | 126              | 60°C | 5%   |  |
| <i>HRAS</i>                                                                      | 2         | chr11:534203-534375                            | p.G12; p.G13; p.Q22                                                                    | <u>ACACTGACGACATGGTTCTACA</u> GTGGGCGAGGAGACCCTGTAGGAGGAC    | TACGGTAGCAGAGACTTGGTCTCAGGCTCACCTCTATAGTGGGGTCTG       | CS1/2                                         | 173              | 60°C | 5%   |  |
| <i>HRAS</i>                                                                      | 3         | chr11:533818-533934                            | p.T58; p.A59; p.Q61; p.E62; p.E63-D69                                                  | <u>ACACTGACGACATGGTTCTACA</u> GGAAGCAGGTGGTCAATTGATGGGGAG    | TACGGTAGCAGAGACTTGGTCTACAGGAAGCCCTCCCGGTGCG            | CS1/2                                         | 117              | 60°C | 5%   |  |
| <i>PTPN11</i>                                                                    | 8         | chr12:112915408-112915583                      | p.F285; p.R289; p.N308; p.I309                                                         | <u>ACACTGACGACATGGTTCTACA</u> CTGAAGCAGTCCAGGACTTATGTGAC     | TACGGTAGCAGAGACTTGGTCTATAGGCTAGAAATGTATGGTCAGAAACT     | CS1/2                                         | 176              | 60°C | 0    |  |
| <i>RET</i>                                                                       | 11        | chr10:43609885-43610015                        | p.C630; p.C634                                                                         | <u>ACACTGACGACATGGTTCTACA</u> GAGCCTCTGGCGGTGCCAAGCCTCA      | TACGGTAGCAGAGACTTGGTCTCAGAAGCAGACAGCAGCACCGAGACGAT     | CS1/2                                         | 131              | 60°C | 5%   |  |
| <i>RET</i>                                                                       | 16        | chr10:43617335-43617490                        | p.M918                                                                                 | <u>ACACTGACGACATGGTTCTACA</u> ACCCCTCTTCTAGAGATTAGAGT        | TACGGTAGCAGAGACTTGGTCTCCCAAGAGAGCAACACCCACAC           | CS1/2                                         | 156              | 60°C | 0    |  |

**Secondary amplification for addition of barcoded Ion PGM adapters**

| Forward primer | Reverse primer | Forward primer 5' to 3' [CS1 underlined]                                   | Reverse primer 5' to 3' [CS2 underlined]                                   | common tails used for secondary amplification | Target size (bp) | Tm   | DMSO |
|----------------|----------------|----------------------------------------------------------------------------|----------------------------------------------------------------------------|-----------------------------------------------|------------------|------|------|
| A_BC_CS1       | trP1_CS2       | <u>CCATCTCATCCCTGCGTGTCTCCGACTCAG</u> -[BC]- <u>ACACTGACGACATGGTTCTACA</u> | <u>CCTCTCTATGGGCAGTCGGTGA</u> T <u>TACGGTAGCAGAGACTTGGTCT</u>              | NA                                            | NA               | 60°C | 0    |
| trP1_CS1       | A_BC_CS2       | <u>CCTCTCTATGGGCAGTCGGTGA</u> T <u>ACACTGACGACATGGTTCTACA</u>              | <u>CCATCTCATCCCTGCGTGTCTCCGACTCAG</u> -[BC]- <u>TACGGTAGCAGAGACTTGGTCT</u> | NA                                            | NA               | 60°C | 0    |

**Primer sequences used for variant validation by dideoxy-sequencing**

| Gene   | Genomic co-ordinates of targeted region (hg19) | Codons queried  | Forward primer 5' to 3' [tail underlined]              | Reverse primer 5' to 3' [tail underlined]               | Primer tails used for dideoxy sequencing | Target size (bp) | Tm   | DMSO |
|--------|------------------------------------------------|-----------------|--------------------------------------------------------|---------------------------------------------------------|------------------------------------------|------------------|------|------|
| ALK    | chr2:29416405-29416516                         | p.L1489         | <u>GTA AACAGCAGCGCCAGTGGTGGTTTCTCTGTAAACCAG</u>        | <u>AGCGGATAACAATTTACACAGGA</u> ATTCTCTCAGTCCAACCTCCT    | M13F/R                                   | 112              | 60°C | 0    |
| ASXL1  | chr20:31019124-31019241                        | p.L267          | <u>ACACTGACGACATGGTTCTACAGTCAAATGAAGCGCAACAGA</u>      | <u>TACGGTAGCAGAGACTTGGTCTTGATGGTAAGGCATGGAA</u>         | CS1/2                                    | 118              | 60°C | 5%   |
| ASXL1  | chr20:31023211-31023362                        | p.E914          | <u>ACACTGACGACATGGTTCTACATACCCATCCCATCGAATGATGA</u>    | <u>TACGGTAGCAGAGACTTGGTCTACCTCCTCAGCTGTCAAATCC</u>      | CS1/2                                    | 152              | 60°C | 0    |
| CHD7   | chr8:61765888-61766001                         | p.E2222         | <u>ACACTGACGACATGGTTCTACAGAGAGCAAGCAGGAATGTGAG</u>     | <u>TACGGTAGCAGAGACTTGGTCTCTCTCGAACCTTTCTCTGAA</u>       | CS1/2                                    | 114              | 60°C | 0    |
| DICER1 | chr14:95592989-95593143                        | p.V255-p.L257   | <u>ACACTGACGACATGGTTCTACATTTTAAATGTCACTCTCACTACTGC</u> | <u>TACGGTAGCAGAGACTTGGTCTTGCTTCTTAATTCATCAGCA</u>       | CS1/2                                    | 155              | 60°C | 5%   |
| DICER1 | chr14:95562561-95562741                        | p.V1525L        | <u>ACACTGACGACATGGTTCTACAGGGCTCCACACAGTCCGCTAT</u>     | <u>TACGGTAGCAGAGACTTGGTCTTGGGATGCAATGTGCTATCTGGA</u>    | CS1/2                                    | 181              | 60°C | 5%   |
| FGFR2  | chr10:123279621-123279702                      | p.P253          | <u>ACACTGACGACATGGTTCTACATCTCCCTCTCCACCAGAGC</u>       | <u>TACGGTAGCAGAGACTTGGTCTCGACCACTGTGGAGGCATTT</u>       | CS1/2                                    | 82               | 60°C | 0    |
| FGFR2  | chr10:123279527-123279658                      | p.W290          | <u>ACACTGACGACATGGTTCTACACCAAGCCGGACTGCC</u>           | <u>TACGGTAGCAGAGACTTGGTCTCCGTATTTACTGCCGTTCTT</u>       | CS1/2                                    | 132              | 60°C | 0    |
| FGFR2  | chr10:123276804-123276983                      | p.Y340; p.C342S | <u>GTA AACAGCAGCGCCAGTTTCTAGGCCGCCGGTGTTA</u>          | <u>AGCGGATAACAATTTACACAGGAAAAACCCAGAGAGAAAGAACAGTAT</u> | M13F/R                                   | 180              | 60°C | 0    |
| FGFR2  | chr10:123274710-123274864                      | p.G384          | <u>ACACTGACGACATGGTTCTACATCTGTTCTCTCTGTGATCT</u>       | <u>TACGGTAGCAGAGACTTGGTCTGTTCTTATTGCGCACAG</u>          | CS1/2                                    | 155              | 60°C | 0    |
| FGFR2  | chr10:123247452-123247639                      | p.K641          | <u>ACACTGACGACATGGTTCTACATCTTGATTTCAAGTGTATTCATCG</u>  | <u>TACGGTAGCAGAGACTTGGTCTCATTCTGAGCCTCACCCC</u>         | CS1/2                                    | 188              | 60°C | 0    |
| FGFR3  | chr4:1803532-1803684                           | p.R248          | <u>ACACTGACGACATGGTTCTACAGTGCCCTGAGCGTCATCT</u>        | <u>TACGGTAGCAGAGACTTGGTCTGCCACTGGATGTGGGGCTGT</u>       | CS1/2                                    | 153              | 60°C | 0    |
| FGFR3  | chr4:1807829-1807954                           | p.K650          | <u>ACACTGACGACATGGTTCTACAGTATGAAGATCGAGACTTCGGGCTG</u> | <u>TACGGTAGCAGAGACTTGGTCTGCCAGCGCTCTACTGGCATGA</u>      | CS1/2                                    | 126              | 60°C | 5%   |
| FGFR4  | chr5:176517856-176518024                       | p.T150-p.R154   | <u>ACACTGACGACATGGTTCTACACGCTGCTCATCTGATCACT</u>       | <u>TACGGTAGCAGAGACTTGGTCTAGCTGGACAGCGGAATTGAC</u>       | CS1/2                                    | 169              | 60°C | 0    |
| FGFR4  | chr5:176518607-176518720                       | p.H206          | <u>GTA AACAGCAGCGCCAGTATGAGGATCTAGCCTCTGGTC</u>        | <u>AGCGGATAACAATTTACACAGGACTCTCCATCAGAGACTCCAG</u>      | M13F/R                                   | 114              | 60°C | 5%   |
| FGFR4  | chr5:176518742-176518873                       | p.L242          | <u>ACACTGACGACATGGTTCTACACATACACCTGCCTGGTAGAG</u>      | <u>TACGGTAGCAGAGACTTGGTCTACCAAGAGGGCACAACCTGAG</u>      | CS1/2                                    | 132              | 60°C | 0    |
| KRAS   | chr12:25380250-25380371                        | p.Q61           | <u>ACACTGACGACATGGTTCTACACAGACTGTGTTCTCCCTCTCA</u>     | <u>TACGGTAGCAGAGACTTGGTCTGGTCCCTCATTGCACTGTACTCC</u>    | CS1/2                                    | 122              | 60°C | 0    |
| LRP5   | chr11:68115485-68115603                        | p.C115          | <u>GTA AACAGCAGCGCCAGTAAGCAGACCTACCTGAACCAGA</u>       | <u>AGCGGATAACAATTTACACAGGAGAGTCCGTCAGTACAGCTTCT</u>     | M13F/R                                   | 119              | 60°C | 5%   |
| MTOR   | chr1:11319313-11319487                         | p.A12-p.T15     | <u>ACACTGACGACATGGTTCTACATCTAAGAACCTCAGGGCAAGA</u>     | <u>TACGGTAGCAGAGACTTGGTCTGTCCATGGTGACATAGTGCTG</u>      | CS1/2                                    | 175              | 60°C | 5%   |
| PTPN11 | chr12:112888088-112888207                      | p.D61           | <u>ACACTGACGACATGGTTCTACATCCCTTGCTCCCTTTCCAATGGA</u>   | <u>TACGGTAGCAGAGACTTGGTCTCCAAGTGGCAAATTTCTCCCTCC</u>    | CS1/2                                    | 120              | 60°C | 0    |
| PTPN11 | chr12:112888173-112888252                      | p.A72           | <u>ACACTGACGACATGGTTCTACATGACCTGTATGGAGGGGAGAAA</u>    | <u>TACGGTAGCAGAGACTTGGTCTCTTTAATGCCCGTATGTTCC</u>       | CS1/2                                    | 80               | 60°C | 0    |

**Table S3.** Testis samples screened for immunopositive tubules with MAGEA4 antibody

| Sample ID    | Age (years) | Number of years since embedding | Clinical reason for orchidectomy | Estimated size of sampled tissue (mm <sup>2</sup> ) | Presence of MAGEA4-immunopositive tubules? | Presence of luminal clusters of spermatogonia (see ref 34) | Sectioned further for microdissection? | Immunopositive tubules present in microdissection region | Sequenced?               | Haloplex barcode                             |                                              |
|--------------|-------------|---------------------------------|----------------------------------|-----------------------------------------------------|--------------------------------------------|------------------------------------------------------------|----------------------------------------|----------------------------------------------------------|--------------------------|----------------------------------------------|----------------------------------------------|
| Testis 8-D   | 39          | 2                               | Inguinal hernia                  | 296                                                 | No                                         | No                                                         | No - no obvious immunopositive tubules | NA                                                       | NA                       | NA                                           |                                              |
| Testis 8-E   |             |                                 |                                  | 301                                                 | Yes                                        | No                                                         | Yes                                    | Yes                                                      | Yes                      | Yes                                          | BC24-BC26; BC46-48; BC27 [Whole section DNA] |
| Testis 8-F   |             |                                 |                                  | 151                                                 | Yes                                        | No                                                         | No - prioritised block E               | NA                                                       | NA                       | NA                                           | NA                                           |
| Testis 9-L2C | 62          | <1                              | Prostate cancer                  | 122                                                 | Yes                                        | No                                                         | Yes                                    | Yes                                                      | Yes                      | BC02-BC04; BC05 [Whole section DNA]          |                                              |
| Testis 9-L4  |             |                                 |                                  | 192                                                 | Yes                                        | No                                                         | No - prioritised block L2              | NA                                                       | NA                       | NA                                           | NA                                           |
| Testis 9-R1  |             |                                 |                                  | 380                                                 | Yes                                        | No                                                         | No - prioritised block L2              | NA                                                       | NA                       | NA                                           | NA                                           |
| Testis 10-F  | 63          | 6                               | Inguinal hernia                  | 189                                                 | Yes                                        | No                                                         | Yes                                    | Yes                                                      | Yes                      | BC10-BC12; BC13 [Whole section DNA]          |                                              |
| Testis 11-H  | 70          | 6                               | None provided                    | 233                                                 | Yes                                        | No                                                         | Yes                                    | Yes                                                      | Yes                      | BC14-BC16; BC17 [Whole section DNA]          |                                              |
| Testis 12-G  | 72          | 1                               | Inguinal hernia                  | 467                                                 | Yes                                        | Yes                                                        | Yes                                    | Yes                                                      | Yes                      | BC32-B34; BC40-42; BC35 [Whole section DNA]  |                                              |
| Testis 12-H  |             |                                 |                                  | 368                                                 | Yes                                        | No                                                         | Yes                                    | Yes                                                      | No - prioritized block G | NA                                           | NA                                           |
| Testis 13-D  | 71          | 3                               | Cystic spermatic cord            | 272                                                 | No                                         | No                                                         | No - no obvious immunopositive tubules | NA                                                       | NA                       | NA                                           |                                              |
| Testis 13-E  |             |                                 |                                  | 169                                                 | Yes                                        | No                                                         | Yes                                    | Yes                                                      | Yes                      | Yes                                          | BC49-51                                      |
| Testis 13-F  |             |                                 |                                  | 302                                                 | No                                         | Yes                                                        | No - no obvious immunopositive tubules | NA                                                       | NA                       | NA                                           | NA                                           |
| Testis 13-G  |             |                                 |                                  | 156                                                 | Yes                                        | No                                                         | No - prioritised blocks E and G        | NA                                                       | NA                       | NA                                           | NA                                           |
| Testis 13-H  |             |                                 |                                  | 291                                                 | Yes                                        | No                                                         | Yes                                    | Yes                                                      | Yes                      | Yes                                          | Yes                                          |
| Testis 14-C  | 80          | 5                               | Inguinal hernia                  | 158                                                 | Yes                                        | No                                                         | No - prioritised block D               | NA                                                       | NA                       | NA                                           |                                              |
| Testis 14-D  |             |                                 |                                  | 206                                                 | Yes                                        | Yes                                                        | Yes                                    | Yes                                                      | Yes                      | Yes                                          | BC20-BC22; BC23 [Whole section DNA]          |
| Testis 15-A  | 80          | 1                               | Inguinal hernia                  | 118                                                 | No                                         | No                                                         | No - no obvious immunopositive tubules | NA                                                       | NA                       | NA                                           |                                              |
| Testis 15-B  |             |                                 |                                  | 126                                                 | Yes                                        | No                                                         | Yes                                    | Yes                                                      | Yes                      | Yes                                          | BC36-BC38; BC39 [Whole section DNA]          |
| Testis 15-C  |             |                                 |                                  | 246                                                 | No                                         | No                                                         | No - no obvious immunopositive tubules | NA                                                       | NA                       | NA                                           | NA                                           |
| Testis 16-D  | 87          | 2                               | Inguinal hernia                  | 408                                                 | Yes                                        | Yes                                                        | Yes                                    | Yes                                                      | Yes                      | BC28-BC30; BC43-45; BC31 [Whole section DNA] |                                              |
| Testis 16-E  |             |                                 |                                  | 341                                                 | Yes                                        | Yes                                                        | Yes                                    | Yes                                                      | No - prioritized block E | NA                                           | NA                                           |

|             |     |     |                 |     |     |                 |                                        |     |                                                    |     |
|-------------|-----|-----|-----------------|-----|-----|-----------------|----------------------------------------|-----|----------------------------------------------------|-----|
| Testis 16-F |     |     |                 | 432 | Yes | Yes             | Yes                                    | Yes | No - prioritized block F                           | NA  |
| Testis 18-F | 57  | 3   | Epididymal cyst | 137 | No  | Yes             | No - no obvious immunopositive tubules | NA  | NA                                                 | NA  |
| Testis 18-G |     |     |                 | 67  | No  | No              | No - no obvious immunopositive tubules | NA  | NA                                                 | NA  |
| Testis 19-F | 62  | 1   | Trauma          | 52  | No  | No              | No - no obvious immunopositive tubules | NA  | NA                                                 | NA  |
| Testis 20-B | 65  | 3   | Inguinal hernia | 229 | No  | Yes             | No - no obvious immunopositive tubules | NA  | NA                                                 | NA  |
| Testis 20-C |     |     |                 | 352 | Yes | No              | Yes                                    | No  | NA                                                 | NA  |
| Testis 20-D |     |     |                 | 170 | No  | Yes             | No - no obvious immunopositive tubules | NA  | NA                                                 | NA  |
| Testis 20-E |     |     |                 | 171 | No  | No              | No - no obvious immunopositive tubules | NA  | NA                                                 | NA  |
| Testis 20-F |     |     |                 | 328 | No  | No              | No - no obvious immunopositive tubules | NA  | NA                                                 | NA  |
| Testis 21-D |     |     |                 | 79  | 5   | Inguinal hernia | 319                                    | Yes | Yes                                                | Yes |
| Testis 21-E | 234 | No  | No              |     |     |                 | No - no obvious immunopositive tubules | NA  | NA                                                 | NA  |
| Testis 21-F | 360 | Yes | No              |     |     |                 | No - prioritised block D               | NA  | NA                                                 | NA  |
| Testis 21-G | 239 | Yes | No              |     |     |                 | No - prioritised block D               | NA  | NA                                                 | NA  |
| Testis 21-I | 299 | No  | No              |     |     |                 | No - no obvious immunopositive tubules | NA  | NA                                                 | NA  |
| Testis 22-D | 85  | 2   | Inguinal hernia | 312 | No  | No              | No - no obvious immunopositive tubules | NA  | NA                                                 | NA  |
| Testis 22-E |     |     |                 | 375 | Yes | No              | Yes                                    | Yes | No - prioritized other samples based on appearance | NA  |
| Testis 22-F |     |     |                 | 91  | No  | No              | No - no obvious immunopositive tubules | NA  | NA                                                 | NA  |
| Testis 22-G |     |     |                 | 17  | No  | No              | No - no obvious immunopositive tubules | NA  | NA                                                 | NA  |
| Testis 23-E | 96  | 3   | Inguinal hernia | 266 | No  | Yes             | No - no obvious immunopositive tubules | NA  | NA                                                 | NA  |
| Testis 23-F |     |     |                 | 181 | Yes | No              | Yes                                    | Yes | No - prioritized other samples based on appearance | NA  |



1. Stain every 4-6 sections with MAGEA4 antibody and identify immunopositive tubules

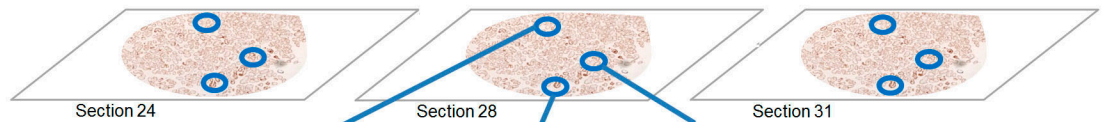

2a. Stain adjacent section with methyl green.

2b. Laser capture microdissect immunopositive clusters of neighboring tubular cross-sections from 3 distinct regions

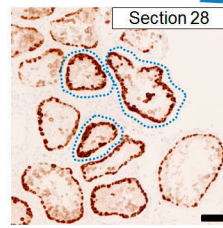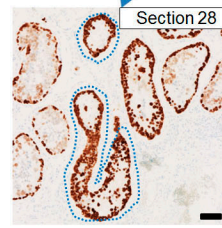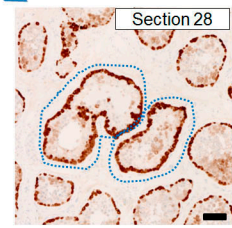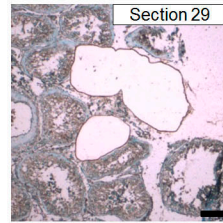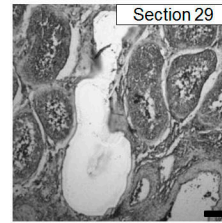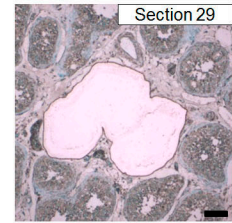

3. DNA extraction and whole genome amplification (WGA)

4. Sequence coding regions of 107 genes using HaloPlex capture and Illumina sequencing

5a. Identify variants specific to WGA tubule by comparing with control (unrelated) DNA using VarScan 2.

5b. Exclude common SNPs (MAF >0.001 in ESP6500 or 1000G)

5c. Prioritize variants based on known disease and/or cancer association

WGA

HaloPlex

Identify variants with allelic frequency  $\geq 0.15$  (excluding SNPs)

Variant prioritization based on disease/cancer association

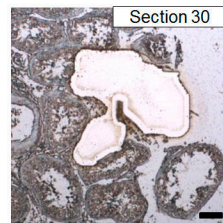

WGA

HaloPlex

Identify variants with allelic frequency  $\geq 0.15$  (excluding SNPs)

Variant prioritization based on disease/cancer association

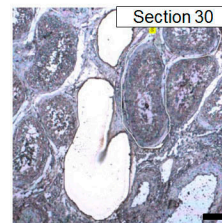

WGA

HaloPlex

Identify variants with allelic frequency  $\geq 0.15$  (excluding SNPs)

Variant prioritization based on disease/cancer association

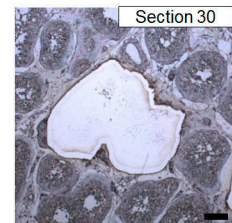

6. Laser capture microdissect immunopositive tubular cross-sections from adjacent slide

7. Screen candidate variants by dideoxy-sequencing non-WGA DNA

8. Mutation confirmed?

PCR and dideoxy-sequence

Yes Further screening  
No No mutation reported

PCR and dideoxy-sequence

Yes Further screening  
No No mutation reported

PCR and dideoxy-sequence

Yes Further screening  
No No mutation reported

9. Screen normal tubules to confirm specificity to immunopositive tubules

10. Screen other immunopositive tubules from same FFPE section to determine distribution of the clone.

Mutation reported

Mutation reported

Mutation reported

Fig. S1. Strategy to identify mutant clones in proof-of-principle study.



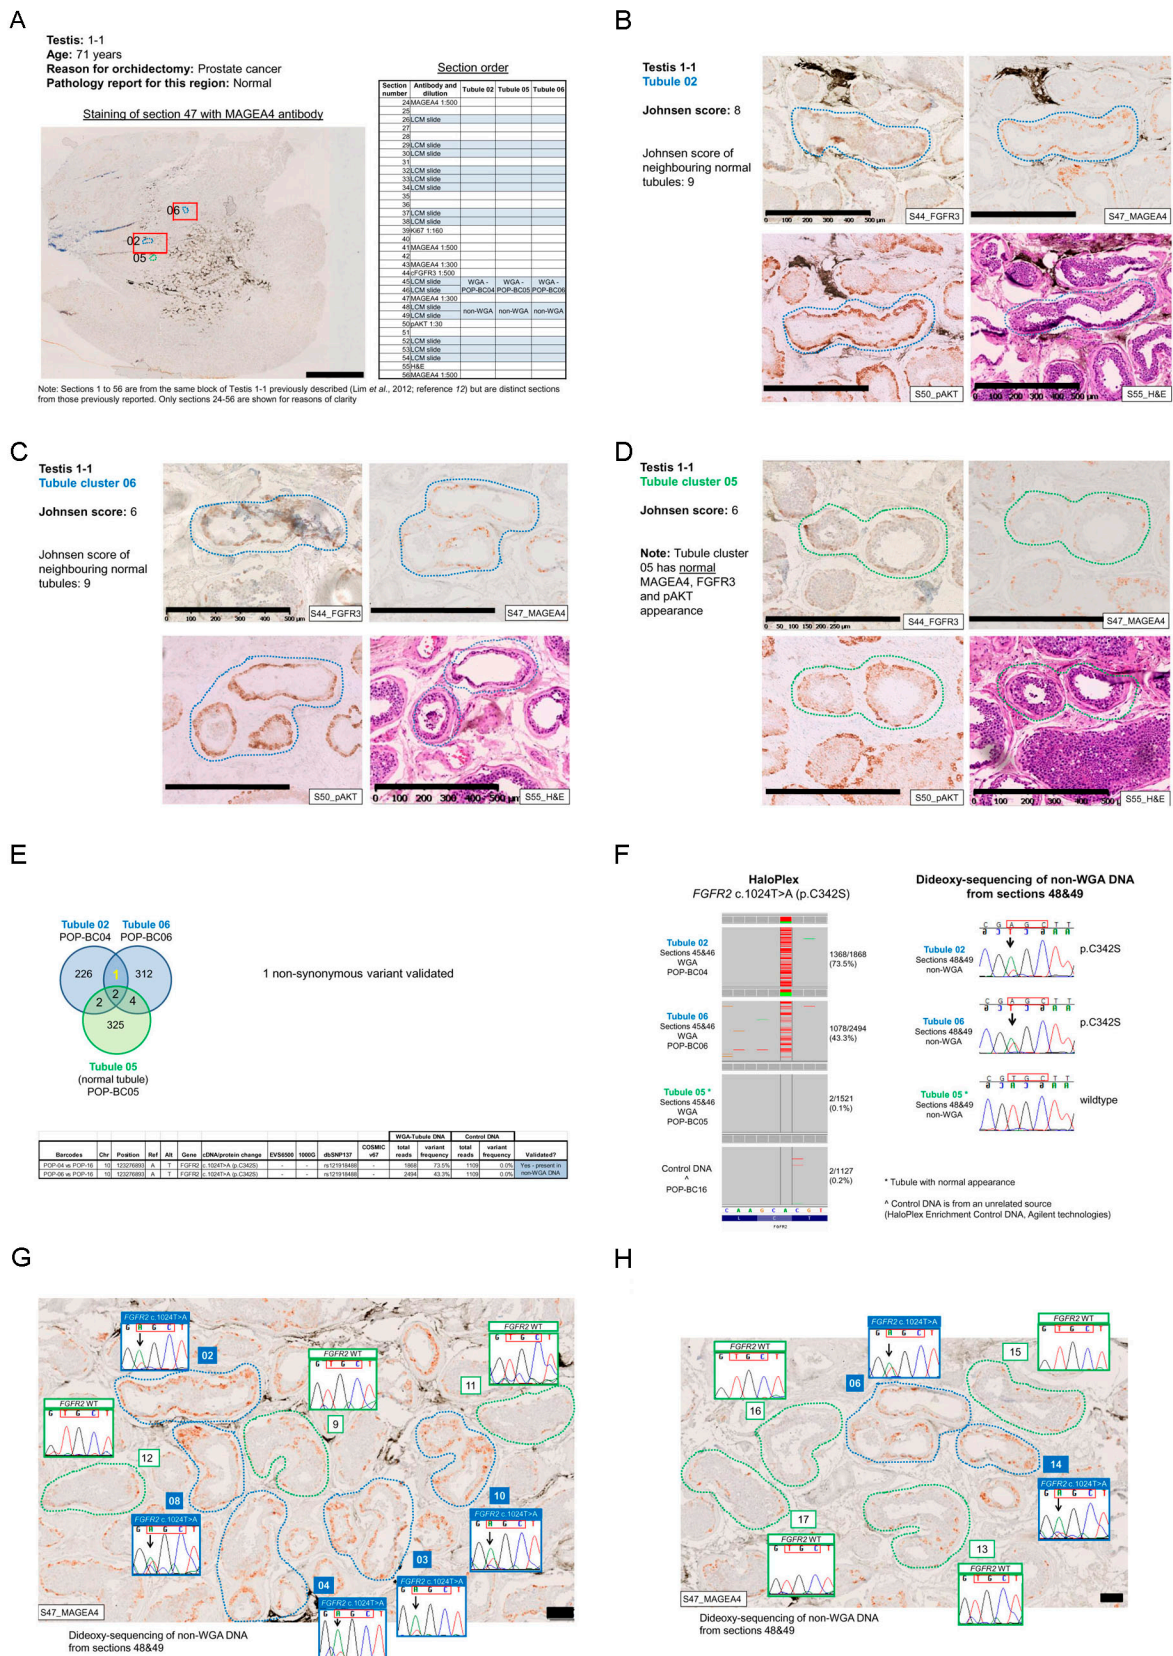

**Fig. S2.** Analysis of Testis 1-1. (A) Low magnification view of the MAGEA4-stained sample, with pathology, serial section order and immunostaining details. The relative locations of the microdissected and HaloPlex-sequenced tubules (02, 05, 06) are indicated. Regions in red boxes are presented at higher magnification in (G) and (H). Scale bar: 5 mm. (B-D) Detailed view of the staining appearance (FGFR3, MAGEA4, pAKT and H&E) and Johnsen scoring of tubule 02 (B), tubule cluster 06 (C), and tubule cluster 05 (D). The tubules surrounded by blue dotted lines are the immunopositive tubules that were microdissected and analyzed on adjacent sections; and the green surround delineates the position of the normally-stained tubule cluster 05. Section numbers (e.g. S44) and staining performed on each section are indicated. Scale bars: 500  $\mu$ m. (E) Number of protein-altering (non-synonymous, frameshift or splice site) variants identified in tubule clusters 02, 05 and 06, after excluding SNPs and variants in control genomic DNA, shown in Venn diagram. One variant was shared by both immunopositive tubule clusters (02 and 06) but not present in the tubule with normal appearance (05). (F) Identification of *FGFR2* c.1024T>A (p.C342S) in HaloPlex-screened WGA DNA from clusters 02 and 06 (viewed in Integrative Genomics Viewer (IGV)). POP-BC = HaloPlex barcode number used for proof-of-principle study. Mutations were confirmed in tubule clusters 02 and 06 by dideoxy-sequencing of non-WGA DNA extracted after microdissection of the equivalent tubule pooled from S48 and S49. (G-H) Further dideoxy-sequencing analysis of tubules with normal (green surround) or immunopositive (blue surround) appearance close to tubule 02 (G) and tubule cluster 6 (H) performed on non-WGA material extracted from S48 and S49. All immunopositive tubules (blue surround) in these regions are apparently homozygous for the *FGFR2* c.1024T>A mutation (wildtype somatic Sertoli cells within the tubule likely account for the minority reference "T" peak). All analyzed tubules with a normal MAGEA4 appearance (green surround) are mutation-negative. Scale bars: 100  $\mu$ m.



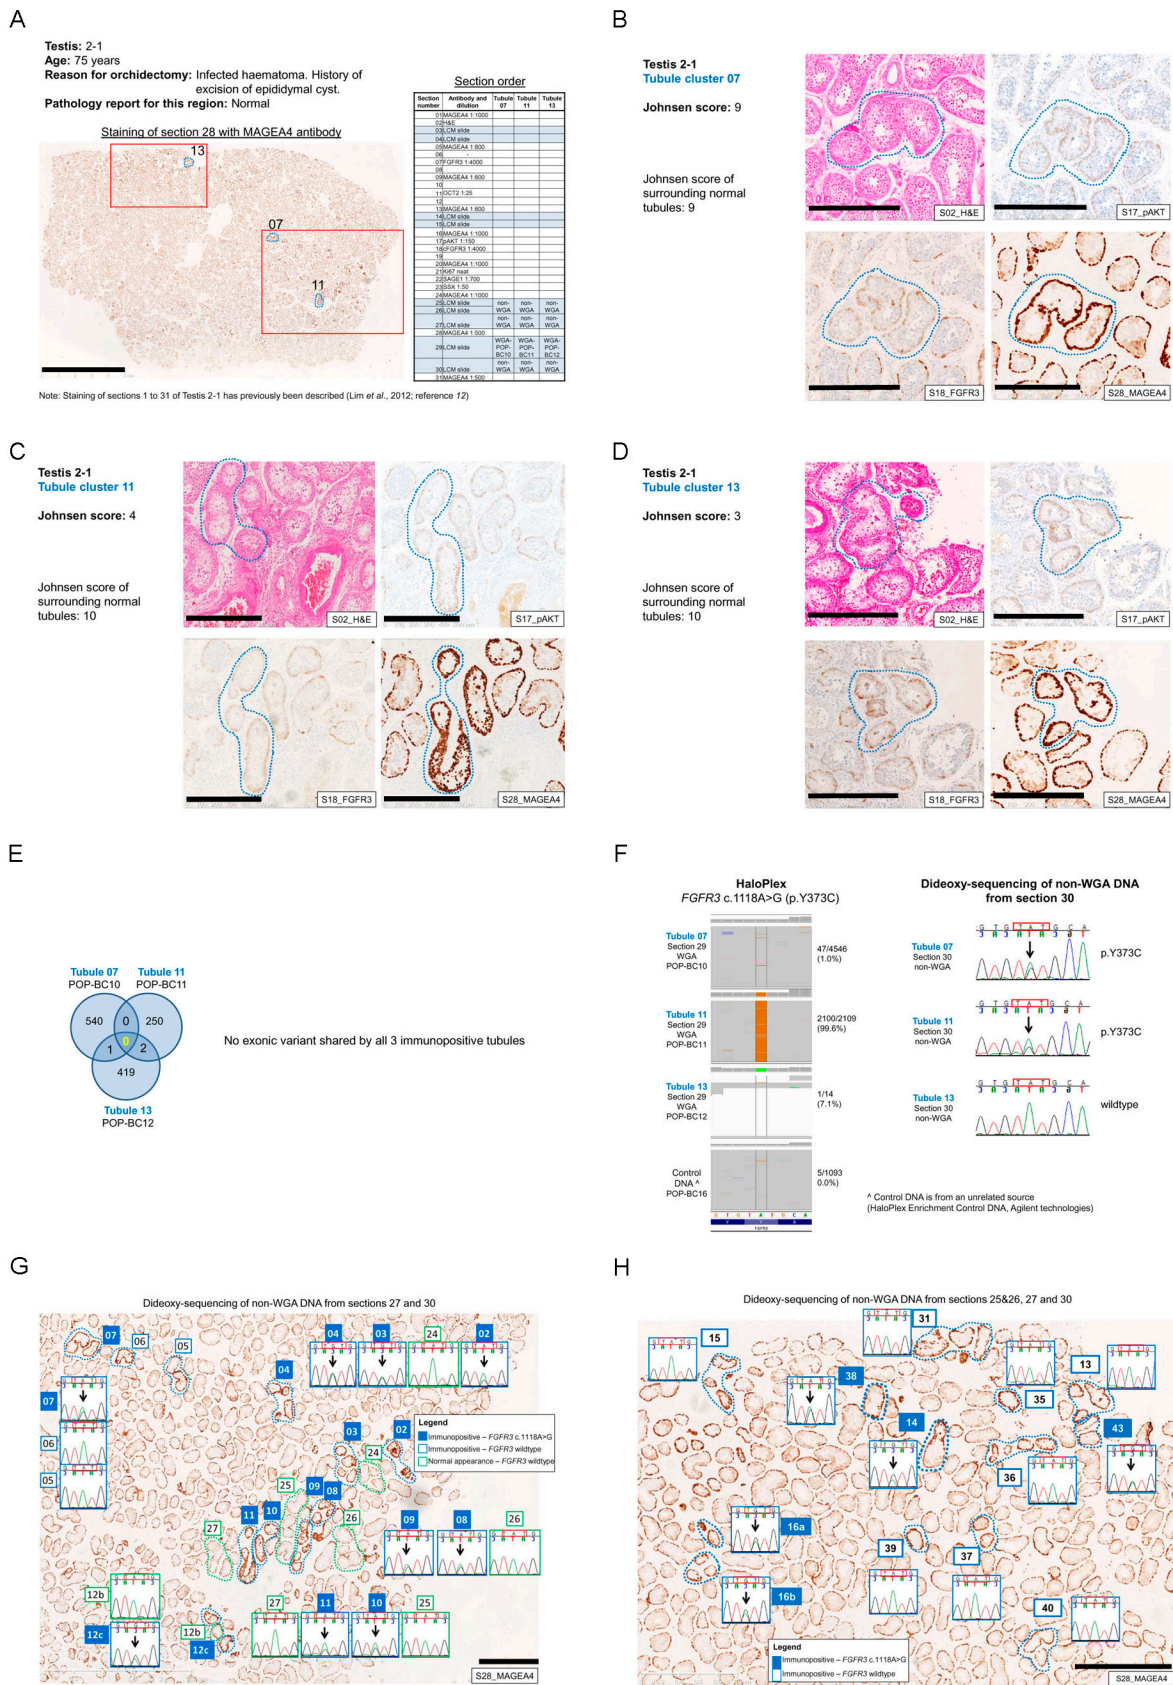

**Fig. S3.** Analysis of Testis 2-1. (A) Low magnification view of the MAGEA4-stained sample, with pathology, serial section order and immunostaining details. The relative locations of the microdissected and HaloPlex-sequenced tubules (07, 11, 13) are indicated. Regions in red boxes are presented at higher magnification in (G) and (H). Scale bar: 5 mm. (B-D) Detailed view of the staining appearance (H&E, pAKT, FGFR3 and MAGEA4) and Johnsen scoring of tubule clusters 07 (B), 11 (C), and 13 (D). The tubules surrounded by blue dotted lines are the immunopositive tubules that were microdissected and analyzed on adjacent sections. Section numbers (e.g. S02) and staining performed on each section are indicated. Scale bars: 500  $\mu$ m. (E) Number of protein-altering (non-synonymous, frameshift or splice site) variants identified in tubule clusters 07, 11 and 13, after excluding SNPs and variants in control genomic DNA, shown in Venn diagram. (F) Identification of *FGFR3* c.1118A>G (p.Y373C) in HaloPlex-screened WGA DNA from tubule cluster 11 (viewed in IGV). Dideoxy-sequencing non-WGA DNA of the equivalent tubule from S30 confirmed the apparently heterozygous mutation in tubule 11 and further identified the same mutation in tubule 07. The mutation was originally detected in the homozygous state in the WGA DNA from tubule cluster 11 but was not identified in the WGA DNA from tubule cluster 07, suggesting that allelic dropout occurred during WGA. Tubule cluster 13 sequence was poorly covered by the HaloPlex capture performed on WGA DNA but analysis of the non-WGA DNA confirmed that it did not harbor the mutation. (G-H) Further dideoxy-sequencing analysis of tubules with normal (green surround) or immunopositive (blue surround) appearance close to tubule clusters 07 and 11 (G) and tubule cluster 13 (H) performed on non-WGA material pooled from S25, S26, S27 and S30. In (G), although the majority of the MAGEA4-immunopositive tubules screened harbored the *FGFR3* c.1118A>G mutation (blue box with white font), some immunopositive tubules did not (white box with blue surround). All tubules with a normal appearance (white box with green surround) that were screened did not harbor the mutation. In (H), although tubule cluster 13 and some other neighboring immunopositive clusters did not harbor the *FGFR3* mutation (white box with blue surround), some immunopositive clusters harbored the *FGFR3* c.1118A>G mutation (blue box with white font). Part of the image shown in (G) is also reproduced in Fig. 1A. Scale bars: 1 mm.



**A**

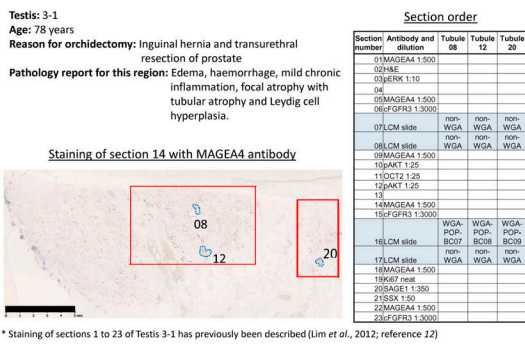

**B**

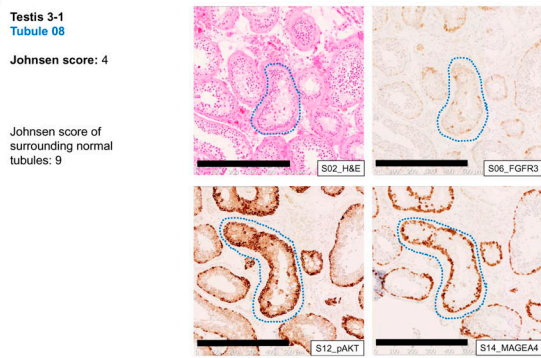

**C**

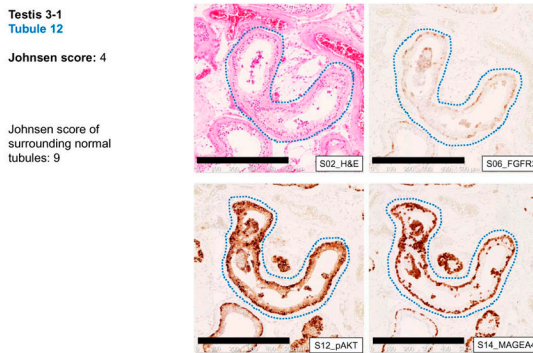

**D**

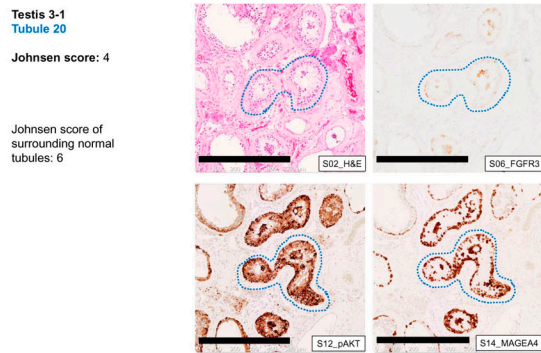

**E**

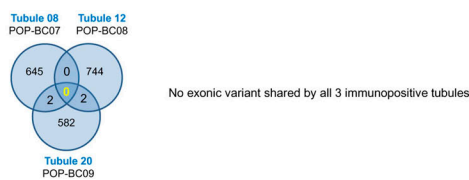

**F**

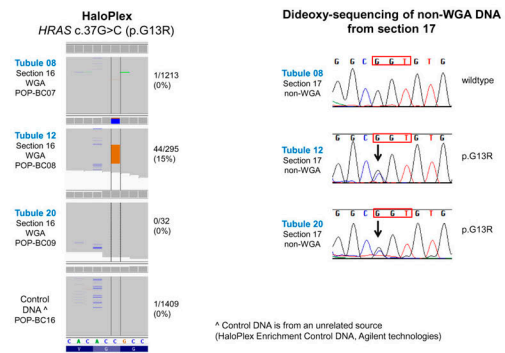

**G**

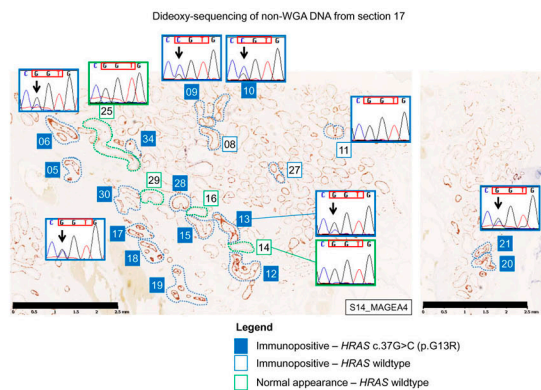

**Fig. S4.** Analysis of Testis 3-1. (A) Low magnification view of the MAGEA4-stained sample, with pathology, serial section order and immunostaining details. The relative locations of the microdissected and HaloPlex-sequenced tubules (08, 12, 20) are indicated. Regions in red boxes are presented at higher magnification in (G). Scale bar: 5 mm. (b-d) Detailed view of the staining appearance (H&E, FGFR3, pAKT and MAGEA4) and Johnsen scoring of tubule 08 (B), tubule 12 (C), and tubule cluster 20 (D). The tubules surrounded by blue dotted lines are the immunopositive tubules that were microdissected and analyzed on adjacent sections. Section numbers (e.g. S02) and staining performed on each section are indicated. Scale bars: 500  $\mu$ m. (E) Number of protein-altering (non-synonymous, frameshift or splice site) variants identified in tubule clusters 08, 12 and 20, after excluding SNPs and variants in control genomic DNA, shown in Venn diagram. (F) Identification of *HRAS* c.37G>C (p. G13R) in HaloPlex-screened WGA DNA from tubule 12 (viewed in IGV). Dideoxy-sequencing non-WGA DNA of the equivalent tubule from S17 confirmed the presence of the heterozygous mutation in tubule 12 and further identified the same mutation in tubule 20. The mutation was not detected in the WGA DNA from tubule cluster 20, suggesting that allelic dropout occurred during WGA. Tubule cluster 08 did not harbor the mutation. (G) Further dideoxy-sequencing analysis of tubules with normal (green surround) or immunopositive (blue surround) appearance performed on non-WGA material from S17. Although the majority of the MAGEA4-immunopositive tubules screened harbored the *HRAS* c.37G>C mutation (blue box with white font), some immunopositive tubules did not (white box with blue surround). All tubules with a normal appearance (white box with green surround) that were screened did not harbor the mutation. For reasons of clarity, only a subset of the dideoxy-sequencing traces are shown. Note: regions 13 and 14 are presented at higher magnification in Fig. 1B. Scale bar: 2.5 mm.

A

**Testis: 7-1**  
**Age: 70 years**  
**Reason for orchidectomy:** Recurrent inguinal hernia repair. Wound sepsis. Necrotising infection.  
**Pathology report for this region:** Mild atrophy with seminiferous tubule basement membrane thickening, minimal focal chronic inflammation and minor Leydig cell hyperplasia.

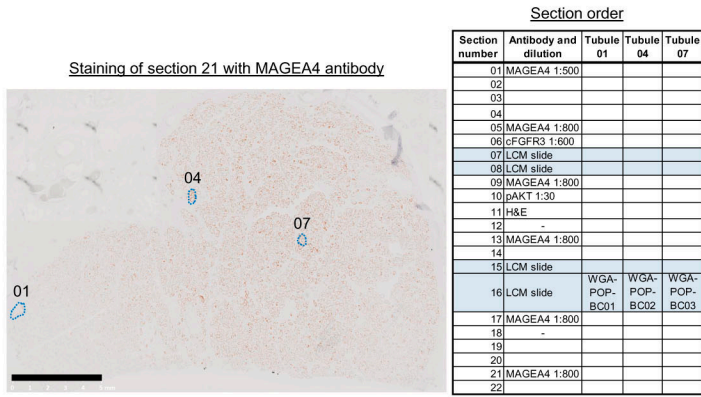

B

**Testis 7-1**  
**Tubule cluster 01**

**Johnsen score: 5**

Johnsen score of surrounding normal tubules: 4

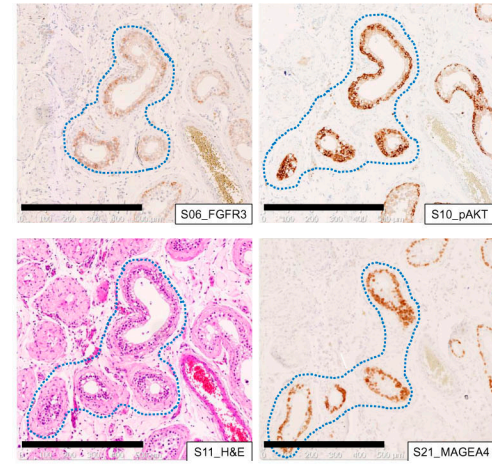

C

**Testis 7-1**  
**Tubule cluster 04**

**Johnsen score: 4**

Johnsen score of surrounding normal tubules: 8

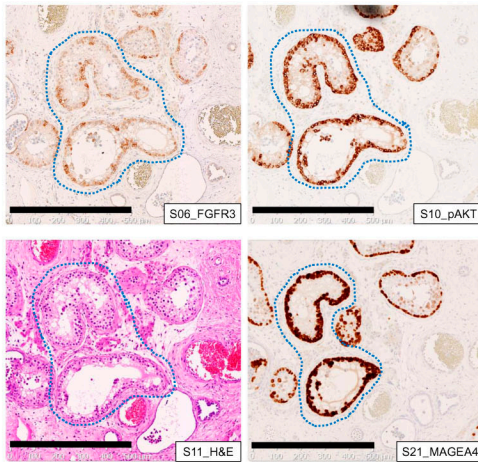

D

**Testis 7-1**  
**Tubule cluster 07**

**Johnsen score: 5**

Johnsen score of surrounding normal tubules: 9

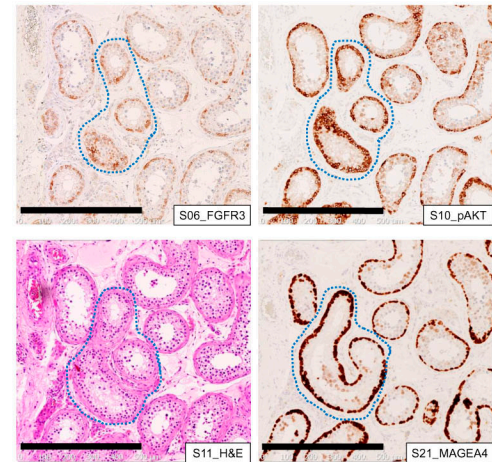

E

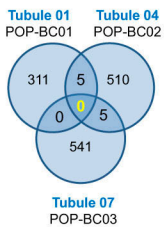

No exonic variant shared by all 3 immunopositive tubules

No candidate variant at hotspots in *FGFR2*, *FGFR3*, *HRAS*, *KRAS*, *PTPN11* or *RET*

**Fig. S5.** Analysis of Testis 7-1. (A) Low magnification view of the MAGEA4-stained sample, with pathology, serial section order and immunostaining details. The relative locations of the microdissected and HaloPlex-sequenced tubules are indicated. Scale bar: 5 mm. (B-D) Detailed view of the staining appearance (FGFR3, pAKT, H&E and MAGEA4) and Johnsen scoring of tubule clusters 01 (B), 04 (C), and 07 (D). The tubules surrounded by blue dotted lines are the immunopositive tubules that were microdissected and analyzed on adjacent sections. Section numbers (e.g. S06) and staining performed on each section are indicated. Scale bars: 500  $\mu$ m. (E) Number of protein-altering (non-synonymous, frameshift or splice site) variants identified in tubule clusters 01, 04 and 07, after excluding SNPs and variants in control genomic DNA, shown in Venn diagram. No variants were shared by all three clusters and no candidate mutations from individual clusters were identified.



1. Stain every 4-6 slides with MAGEA4 antibody and identify immunopositive tubules

2. Extract DNA from 2-3 whole unstained sections to use as constitutional DNA

3a. Stain adjacent sections with methyl green.

3b. Laser capture microdissect same cluster of cross-sections in triplicate (2 sections per replicate)

4. DNA extraction and whole genome amplification (WGA)

5. Sequence coding regions of 135 genes using HaloPlex capture and Illumina sequencing

6. Identify variants specific to WGA tubule DNA by comparing with matched constitutional DNA using Varscan 2.

7a. Prioritize variants common to all 3 replicates for validation (step 7).

7b. If none present/confirmed, prioritize known PAE hotspot mutations present in 1 or 2 replicates

8. PCR non-WGA DNA from adjacent sections & dideoxy-sequence.

9. Mutation confirmed?

10. Screen neighboring normal tubules to confirm specificity to immunopositive tubules

11. Screen other immunopositive tubules from same FFPE section to determine distribution of the clone.

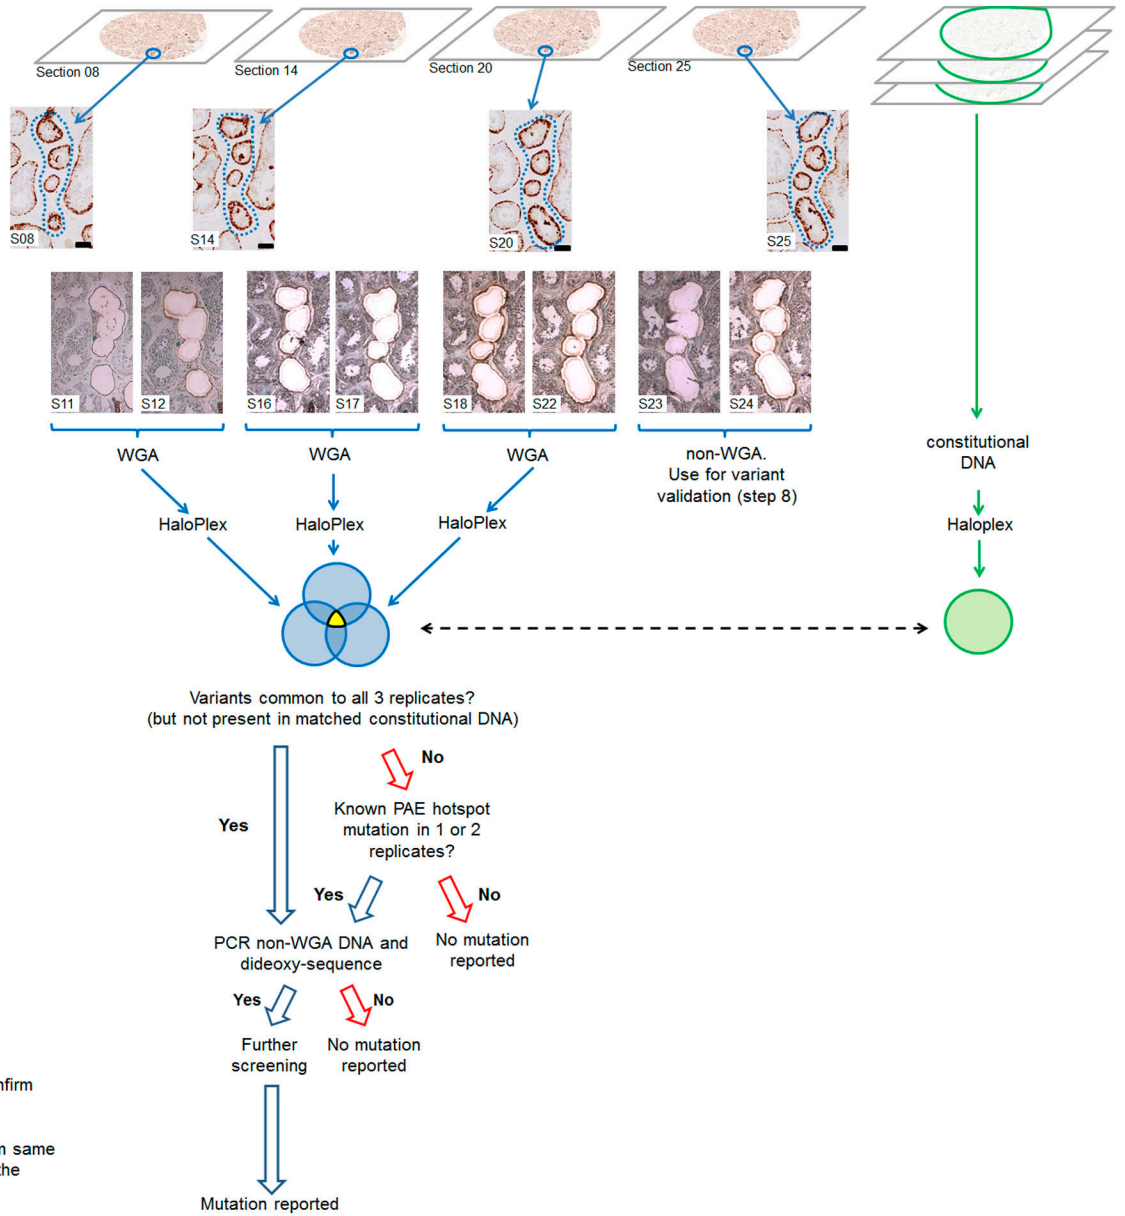

**Fig. S6.** Triplicate strategy to identify mutant clones in main study.

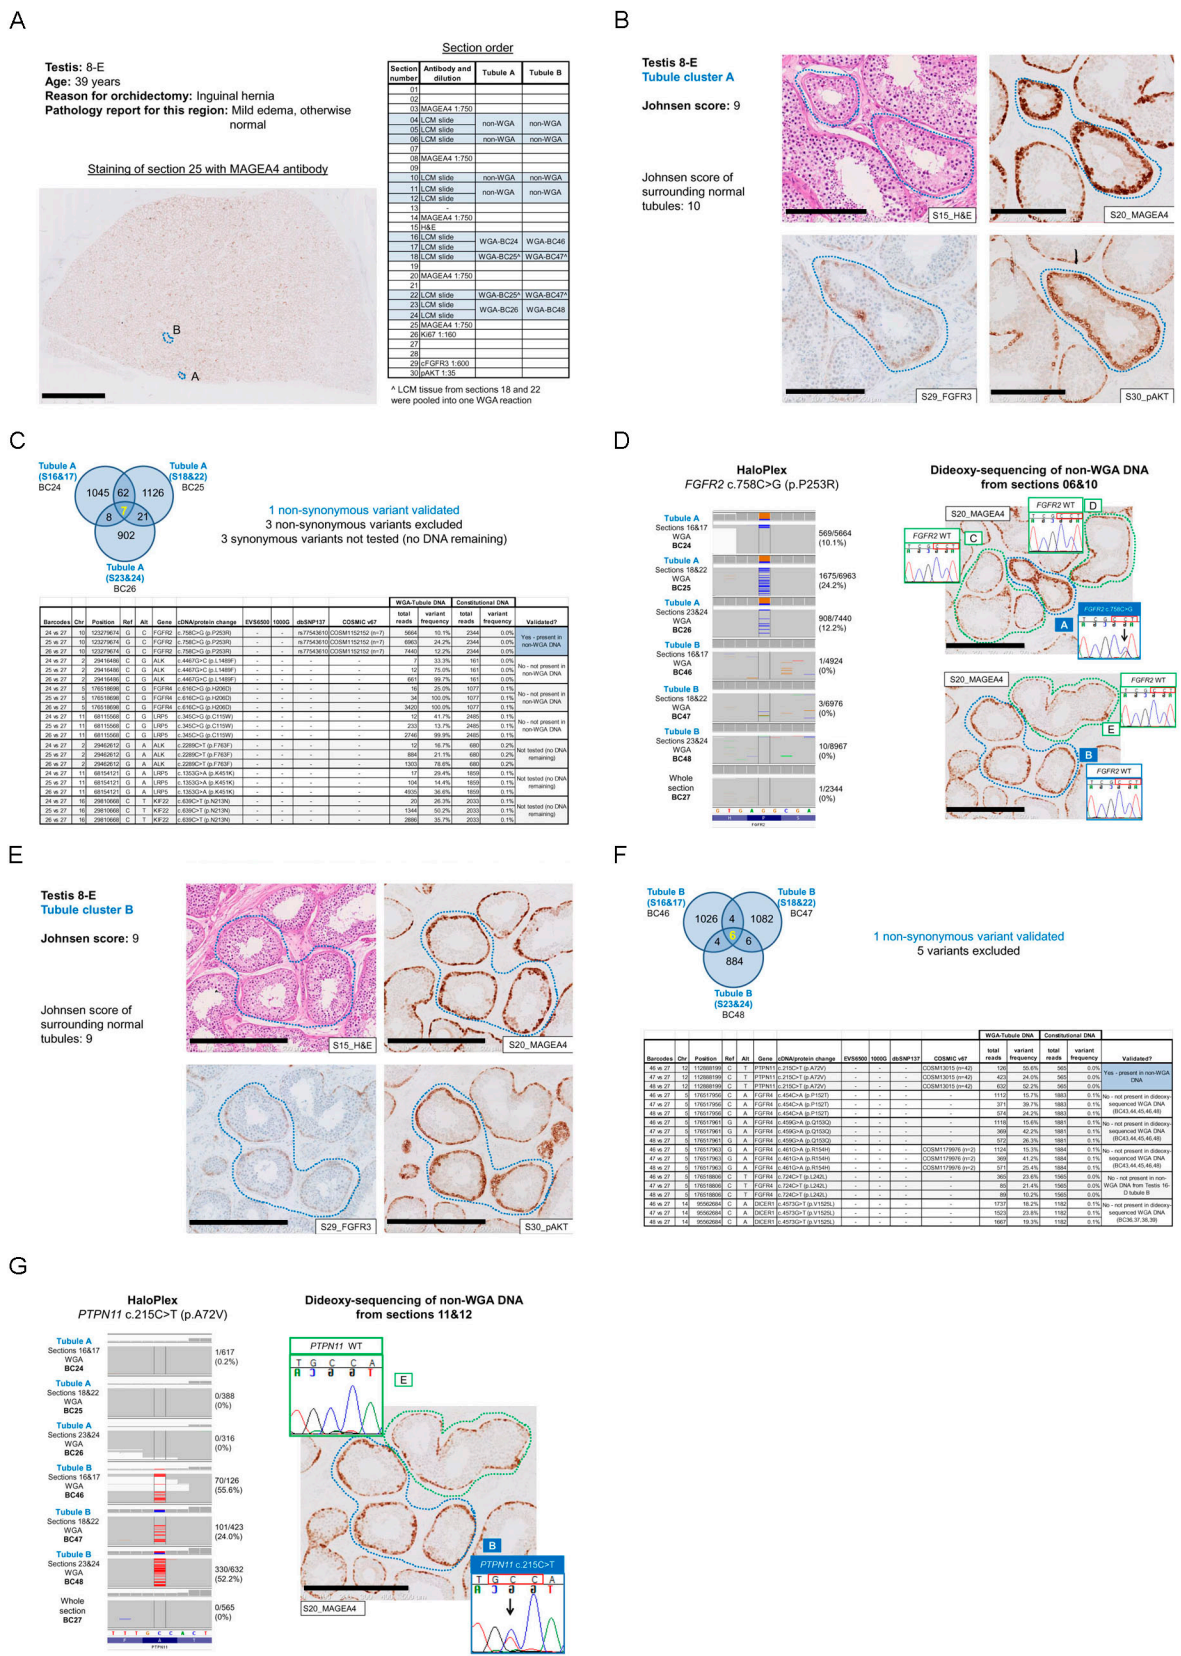

**Fig. S7. Analysis of tubule clusters A and B in Testis 8-E. (A)** Low magnification view of the MAGEA4-stained sample, with pathology, serial section order and immunostaining details. The relative locations of the microdissected and HaloPlex-sequenced tubule clusters A and B are indicated. Scale bar: 5 mm. **(B)** Detailed view of the staining appearance (H&E, MAGEA4, FGFR3 and pAKT) and Johnsen scoring of tubule cluster A. The tubules surrounded by blue dotted lines are the immunopositive tubules that were microdissected and analyzed on adjacent sections. Section numbers (e.g. S15) and staining performed on each section are indicated. Scale bars: 250  $\mu$ m. **(C)** Number of exonic single nucleotide variants (SNVs) and indels identified in the triplicate samples for tubule cluster A but not present in the matched whole section (constitutional) DNA shown in Venn diagram. Seven variants were common to each of the triplicates, only one of which was validated (blue box). Three variants were excluded as they were not detected in dideoxy-sequenced non-WGA DNA of the equivalent tubule from an adjacent section. Three synonymous variants were not tested due to lack of DNA. **(D)** Identification and validation of the heterozygous *FGFR2* c.758C>G (p.P253R) in tubule cluster A. The *FGFR2* c.758C>G mutation is present in the triplicate WGA DNA samples from tubule cluster A, but not in tubule cluster B or the whole section DNA (viewed in IGV). The mutation was validated by dideoxy-sequencing of non-WGA DNA of the equivalent tubule pooled from S06 and S10 (upper right; also illustrated in Fig. 1C). The mutation was not detected in the immunopositive tubule cluster B (lower right, blue surround) or tubules with normal MAGEA4-staining appearance (green surround). Scale bars: 500  $\mu$ m. **(E)** Detailed view of the staining appearance (MAGEA4, FGFR3, pAKT and H&E) and Johnsen scoring of tubule cluster B. The tubules surrounded by blue dotted lines are the immunopositive tubules that were microdissected and analyzed on adjacent sections. Scale bars: 500  $\mu$ m. **(F)** Number of exonic SNVs and indels identified in the triplicate samples for tubule cluster B but not present in the matched whole section (constitutional) DNA shown in Venn diagram. Six variants were common to each of the triplicates, only one of which was validated (blue box). Five variants were excluded as they were not detected in dideoxy-sequenced non-WGA DNA of the equivalent tubule from an adjacent section or were demonstrated to be alignment errors in other WGA samples. **(G)** Identification and validation of the heterozygous *PTPN11* c.215C>T (p.A72V) in tubule cluster B. The *PTPN11* c.215C>T mutation is present in the triplicate WGA DNA samples from tubule cluster B, but not in tubule cluster A or the whole section DNA. The mutation was validated by dideoxy-sequencing of non-WGA DNA of the equivalent immunopositive tubule (blue surround) pooled from S11 and S12. The mutation was not detected in neighboring tubules with normal MAGEA4-staining appearance (green surround). Scale bar: 500  $\mu$ m.



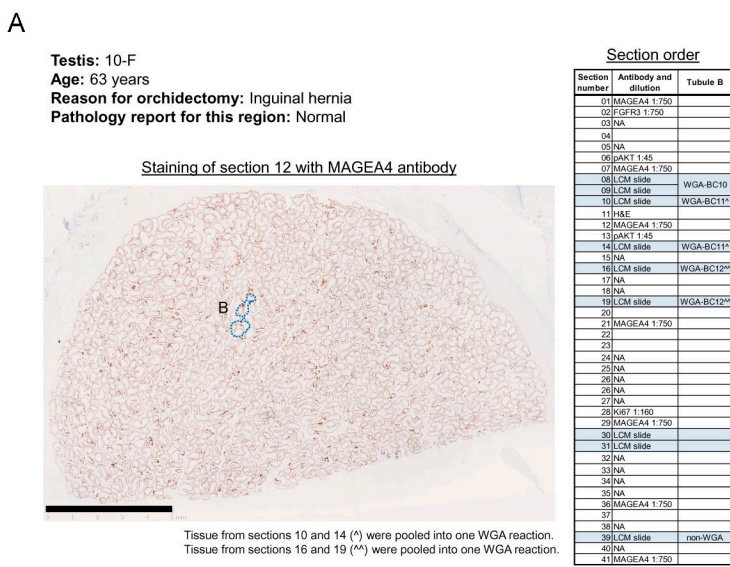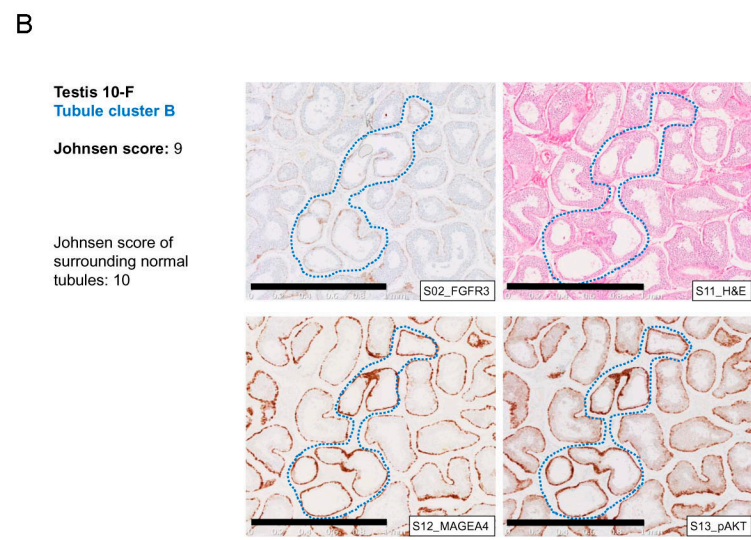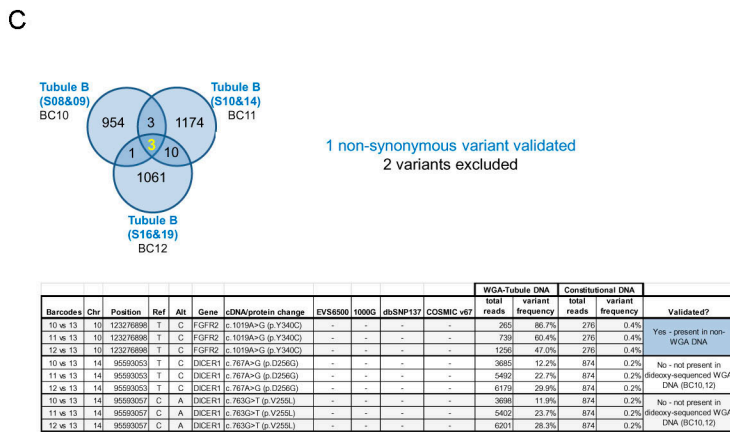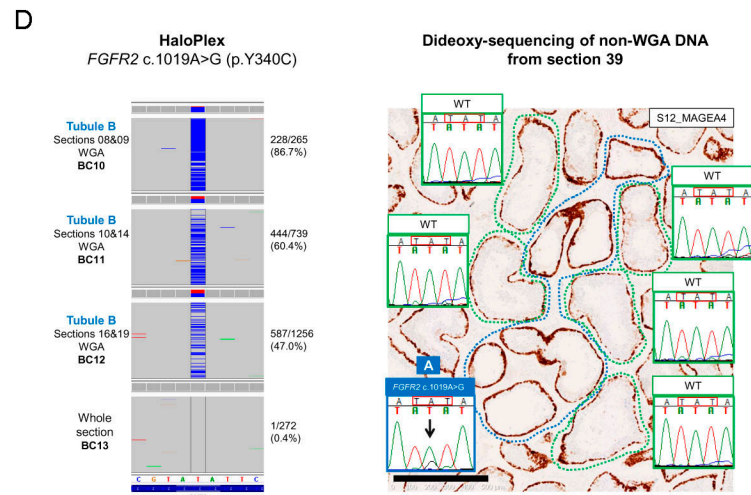

**Fig. S8.** Analysis of Testis 10-F. (A) Low magnification view of the MAGEA4-stained sample, with pathology, serial section order and immunostaining details. The location of the microdissected and HaloPlex-sequenced tubule cluster B is indicated. Scale bar: 5 mm. (B) Detailed view of the staining appearance (FGFR3, H&E, MAGEA4 and pAKT) and Johnsen scoring of tubule cluster B. The tubules surrounded by blue dotted lines are the immunopositive tubules that were microdissected and analyzed on adjacent sections. Section numbers (e.g. S02) and staining performed on each section are indicated. Scale bars: 1 mm. (C) Number of exonic SNVs and indels identified in the triplicate samples for tubule cluster B but not present in the matched whole section (constitutional) DNA shown in Venn diagram. Three variants were common to each of the triplicates, only one of which was validated (blue box). Two variants were excluded as they were demonstrated to be alignment errors in other WGA samples. (D) Identification and validation of the heterozygous *FGFR2* c.1019A>G (p.Y340C) in tubule cluster B. The *FGFR2* c.1019A>G mutation is present in the triplicate WGA DNA samples from tubule cluster B, but not in the whole section DNA (viewed in IGV). The mutation was validated by dideoxy-sequencing of non-WGA DNA of the equivalent tubule from S39 (blue surround). The mutation was not detected in tubules with normal MAGEA4-staining appearance (green surround). Scale bar: 500  $\mu$ m.







A

Testis: 12-E \*  
 Age: 71 years  
 Reason for orchidectomy: Inguinal hernia  
 Pathology report for this region: Normal

Staining of section 14 with MAGEA4 antibody

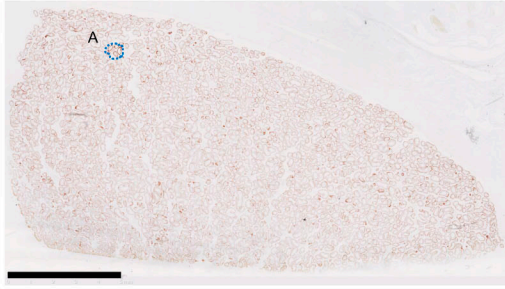

\* Note: 12-E and 12-H are distinct tissue blocks from the same testis

Section order

| Section number | Antibody and dilution | Tubule A              |
|----------------|-----------------------|-----------------------|
| 01             |                       |                       |
| 02             |                       |                       |
| 03             | MAGEA4 1:750          |                       |
| 04             | LCM slide             |                       |
| 05             | LCM slide             |                       |
| 06             | LCM slide             |                       |
| 07             |                       |                       |
| 08             | MAGEA4 1:750          |                       |
| 09             |                       |                       |
| 10             | LCM slide             |                       |
| 11             | LCM slide             | non-WGA               |
| 12             | LCM slide             | non-WGA               |
| 13             |                       |                       |
| 14             | MAGEA4 1:750          |                       |
| 15             | H&E                   |                       |
| 16             | LCM slide             | WGA-BC49              |
| 17             | LCM slide             |                       |
| 18             | LCM slide             | WGA-BC50 <sup>^</sup> |
| 19             |                       |                       |
| 20             | MAGEA4 1:750          |                       |
| 21             |                       |                       |
| 22             | LCM slide             | WGA-BC50 <sup>^</sup> |
| 23             | LCM slide             |                       |
| 24             | LCM slide             | WGA-BC51              |
| 25             | MAGEA4 1:750          |                       |
| 26             | Ki67 1:160            |                       |
| 27             |                       |                       |
| 28             |                       |                       |
| 29             | cFGFR3 1:800          |                       |
| 30             | pAKT 1:35             |                       |

<sup>^</sup> LCM tissue from sections 18 and 22 were pooled into one WGA reaction

B

Testis 12-E  
 Tubule cluster A

Johnsen score: 5

Johnsen score of surrounding normal tubules: 8

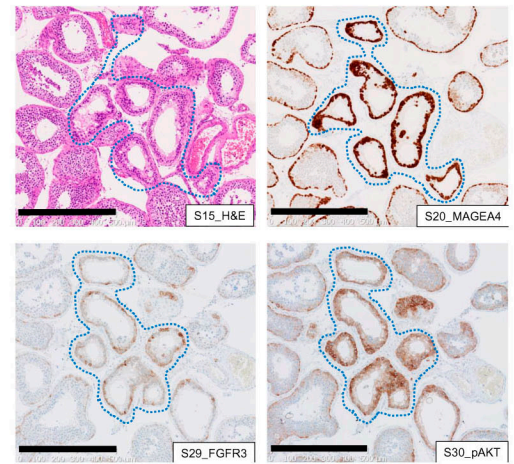

C

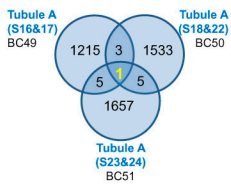

1 non-synonymous variant validated

| Barcode | Chr | Position | Ref | Alt | Gene | cDNA/protein change | EVS6500 | 1000G | dbSNP137    | COSMIC v67         | WGA-Tubule DNA |                   | Constitutional DNA |                   | Validated?                   |
|---------|-----|----------|-----|-----|------|---------------------|---------|-------|-------------|--------------------|----------------|-------------------|--------------------|-------------------|------------------------------|
|         |     |          |     |     |      |                     |         |       |             |                    | total reads    | variant frequency | total reads        | variant frequency |                              |
| 49      | 09  | 25380276 | T   | C   | KRAS | c.182A>G (p.Q61R)   | -       | -     | rs121913240 | COSM1158660 (r=66) | 1752           | 55.0%             | 2205               | 0.1%              | Yes - present in non-WGA DNA |
| 50      | 09  | 25380276 | T   | C   | KRAS | c.182A>G (p.Q61R)   | -       | -     | rs121913240 | COSM1158660 (r=66) | 1532           | 23.9%             | 2205               | 0.1%              |                              |
| 51      | 09  | 25380276 | T   | C   | KRAS | c.182A>G (p.Q61R)   | -       | -     | rs121913240 | COSM1158660 (r=66) | 1291           | 12.2%             | 2205               | 0.1%              |                              |

D

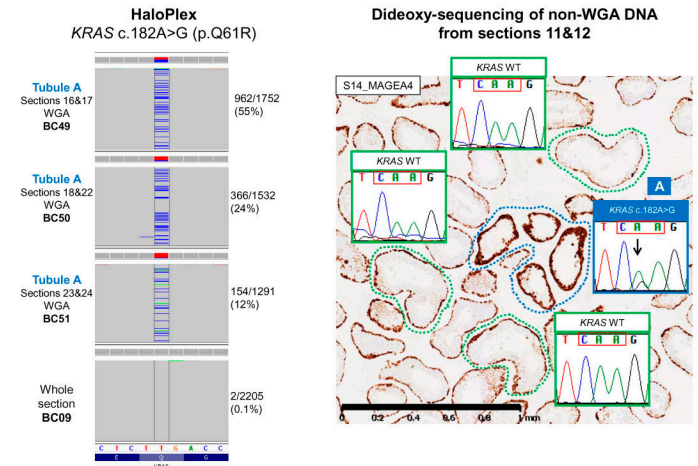

**Fig. S10.** Analysis of Testis 12-E. (A) Low magnification view of the MAGEA4-stained sample, with pathology, serial section order and immunostaining details. The location of the microdissected and HaloPlex-sequenced tubule cluster A is indicated. Scale bar: 5 mm. (B) Detailed view of the staining appearance (H&E, MAGEA4, FGFR3 and pAKT) and Johnsen scoring of tubule cluster A. The tubules surrounded by blue dotted lines are the immunopositive tubules that were microdissected and analyzed on adjacent sections. Section numbers (e.g. S15) and staining performed on each section are indicated. Scale bars: 500  $\mu$ m. (C) Number of exonic SNVs and indels identified in the triplicate samples for tubule cluster A but not present in the matched whole section (constitutional) DNA shown in Venn diagram. Only one variant was common to each of the triplicates, and was subsequently validated (blue box). (D) Identification and validation of the heterozygous *KRAS* c.182A>G (p.Q61R) in tubule cluster A. The *KRAS* c.182A>G mutation is present in the triplicate WGA DNA samples from tubule cluster A, but not in the whole section DNA (viewed in IGV). The mutation was validated by dideoxy-sequencing of non-WGA DNA of the equivalent tubule from an adjacent section (blue surround). The mutation was not detected in tubules with normal MAGEA4-staining appearance (green surround). Scale bar: 1 mm.

A

Testis: 15-B

Age: 80 years

Reason for orchidectomy: Inguinal hernia

Pathology report for this region: Areas of marked atrophy with completely atrophic seminiferous tubules, Leydig cell hyperplasia.

Staining of section 20 with MAGEA4 antibody

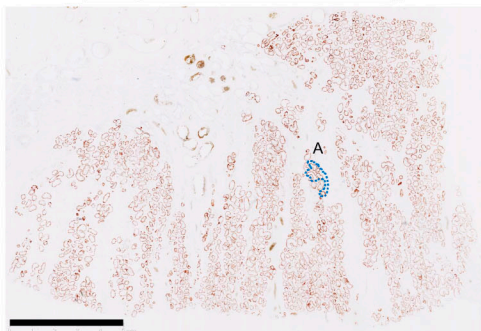

Section order

| Section number | Antibody and dilution | Tubule A              |
|----------------|-----------------------|-----------------------|
| 01             |                       |                       |
| 02             |                       |                       |
| 03             | MAGEA4 1:1000         |                       |
| 04             | LCM slide             |                       |
| 05             | LCM slide             | WGA-BC36              |
| 06             | LCM slide             | WGA-BC37 <sup>a</sup> |
| 07             |                       |                       |
| 08             | MAGEA4 1:1000         |                       |
| 09             |                       |                       |
| 10             | LCM slide             | WGA-BC37 <sup>a</sup> |
| 11             | LCM slide             |                       |
| 12             | LCM slide             | WGA-BC38              |
| 13             |                       |                       |
| 14             | MAGEA4 1:1000         |                       |
| 15             | H&E                   |                       |
| 16             | LCM slide             |                       |
| 17             | LCM slide             | non-WGA               |
| 18             | LCM slide             | non-WGA               |
| 19             |                       |                       |
| 20             | MAGEA4 1:1000         |                       |
| 21             |                       |                       |
| 22             | LCM slide             | non-WGA               |
| 23             | LCM slide             |                       |
| 24             | LCM slide             |                       |
| 25             | MAGEA4 1:1000         |                       |
| 26             | Ki67 1:160            |                       |
| 27             |                       |                       |
| 28             |                       |                       |
| 29             |                       |                       |
| 30             |                       |                       |

<sup>a</sup> LCM tissue from sections 06 and 10 were pooled into one WGA reaction

B

Testis 15-B  
Tubule cluster A

Johnsen score: 8

Johnsen score of surrounding normal tubules: 10

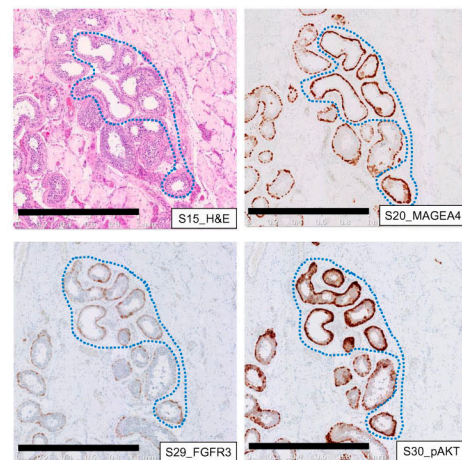

C

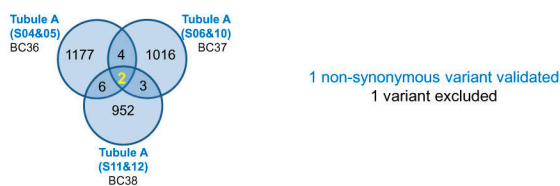

| Barcodes | Chr | Position | Ref | Alt | Gene   | cDNA/protein change | ENSG000 | 1000G | dbSNP-137   | COSMIC v47         | WGA-Tubule DNA |                   | Constitutional DNA |                   | Validated?                                                    |
|----------|-----|----------|-----|-----|--------|---------------------|---------|-------|-------------|--------------------|----------------|-------------------|--------------------|-------------------|---------------------------------------------------------------|
|          |     |          |     |     |        |                     |         |       |             |                    | total reads    | variant frequency | total reads        | variant frequency |                                                               |
| 36 vs 39 | 12  | 25380270 | T   | C   | KRAS   | c.182A>G (p.Q61R)   | -       | -     | rs121913240 | COSM1158600 (n=66) | 791            | 41.2%             | 643                | 0.2%              | Yes - present in non-WGA DNA                                  |
| 37 vs 39 | 12  | 25380276 | T   | C   | KRAS   | c.182A>G (p.Q61R)   | -       | -     | rs121913240 | COSM1158600 (n=66) | 1406           | 30.2%             | 643                | 0.2%              | Yes - present in non-WGA DNA                                  |
| 38 vs 39 | 12  | 25380276 | T   | C   | KRAS   | c.182A>G (p.Q61R)   | -       | -     | rs121913240 | COSM1158600 (n=66) | 1337           | 19.4%             | 643                | 0.2%              | Yes - present in non-WGA DNA                                  |
| 36 vs 39 | 14  | 95562684 | C   | A   | DICER1 | c.4573G>T (p.V152L) | -       | -     | -           | -                  | 191            | 17.2%             | 1000               | 0.4%              | No - not present in dideoxy sequenced WGA DNA (BC36,37,38,39) |
| 37 vs 39 | 14  | 95562684 | C   | A   | DICER1 | c.4573G>T (p.V152L) | -       | -     | -           | -                  | 2998           | 22.3%             | 1000               | 0.4%              | No - not present in dideoxy sequenced WGA DNA (BC36,37,38,39) |
| 38 vs 39 | 14  | 95562684 | C   | A   | DICER1 | c.4573G>T (p.V152L) | -       | -     | -           | -                  | 477            | 14.6%             | 1000               | 0.4%              | No - not present in dideoxy sequenced WGA DNA (BC36,37,38,39) |

D

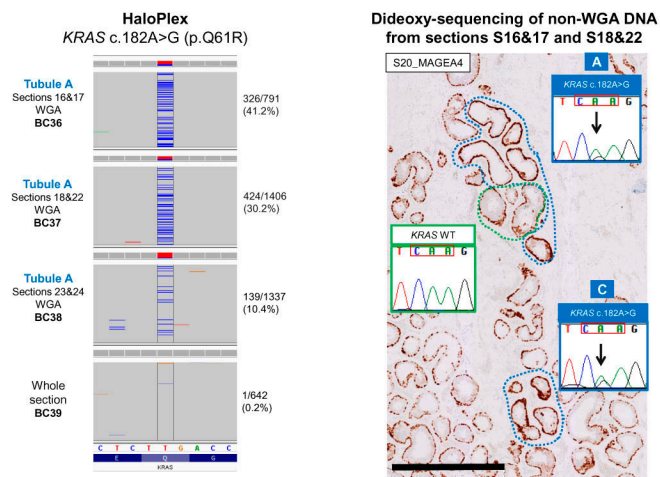

**Fig S11.** Analysis of Testis 15-B. (A) Low magnification view of the MAGEA4-stained sample, with pathology, serial section order and immunostaining details. The location of the microdissected and HaloPlex-sequenced tubule cluster A is indicated. Scale bar: 5 mm. (B) Detailed view of the staining appearance (H&E, MAGEA4, FGFR3 and pAKT) and Johnsen scoring of tubule cluster A. The tubules surrounded by blue dotted lines are the immunopositive tubules that were microdissected and analyzed on adjacent sections. Section numbers (e.g. S15) and staining performed on each section are indicated. Scale bars: 1 mm. (C) Number of exonic SNVs and indels identified in the triplicate samples for tubule cluster A but not present in the matched whole section (constitutional) DNA shown in Venn diagram. Two exonic variants were common to each of the triplicates; only one of which was subsequently validated (blue box). (D) Identification and validation of the heterozygous *KRAS* c.182A>G (p.Q61R) in tubule cluster A. The *KRAS* c.182A>G mutation is present in the triplicate WGA DNA samples from tubule cluster A, but not in the whole section DNA (viewed in IGV). The mutation was validated by dideoxy-sequencing of non-WGA DNA of the equivalent tubule pooled from S18 and S22. Further dideoxy-sequencing analysis of tubules with normal (green surround) or immunopositive (blue surround) MAGEA4 appearance close to tubule cluster A performed on non-WGA material pooled from S16, S17, S18 and S22. All immunopositive tubules (blue surround) in this region are heterozygous for the *KRAS* c.182A>G mutation. All analyzed tubules with a normal MAGEA4 appearance (green surround) are mutation-negative. Scale bar: 1 mm.





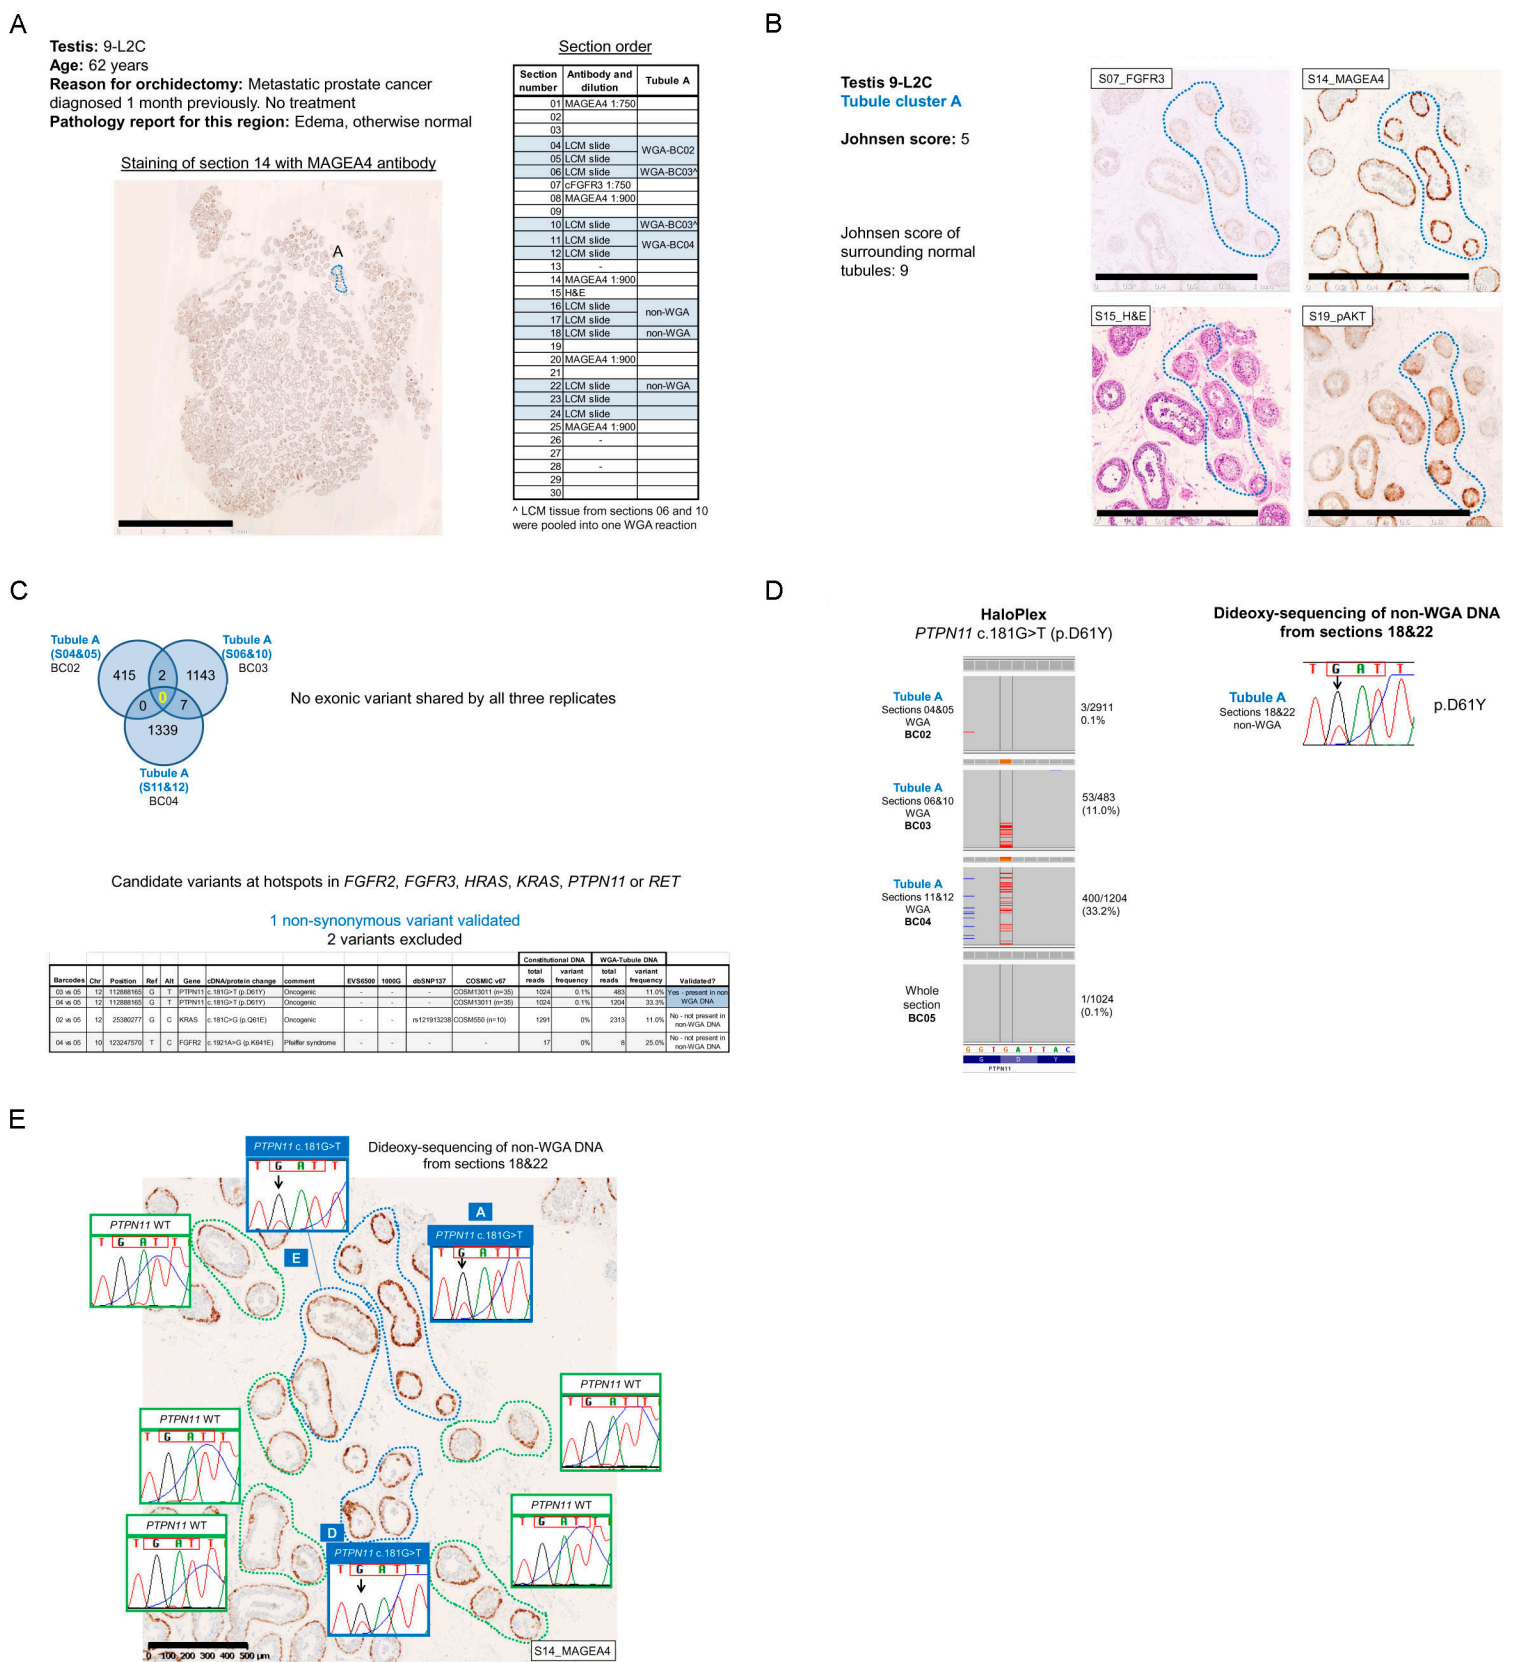

**Fig. S13.** Analysis of Testis 9-L2C. (A) Low magnification view of the MAGEA4-stained sample, with pathology, serial section order and immunostaining details. The location of the microdissected and HaloPlex-sequenced tubule cluster A is indicated. Scale bar: 5 mm. (B) Detailed view of the staining appearance (FGFR3, MAGEA4, H&E and pAKT) and Johnsen scoring of tubule cluster A. The tubules surrounded by blue dotted lines are the immunopositive tubules that were microdissected and analyzed on adjacent sections. Section numbers (e.g. S07) and staining performed on each section are indicated. Scale bars: 1 mm. (C) Number of exonic SNVs and indels identified in the triplicate samples for tubule cluster A but not present in the matched whole section (constitutional) DNA shown in Venn diagram. No exonic variants were common to each of the triplicates. Three candidate variants at known mutational hotspots in *FGFR2*, *KRAS* and *PTPN11* present in one or two replicates were identified and subsequently screened using non-WGA DNA of the equivalent tubule from adjacent sections. One variant was validated (blue box). (D) A *PTPN11* c.181G>T (p.D61Y) mutation was identified by HaloPlex sequencing in two of the triplicate WGA DNA samples. This mutation was validated in the heterozygous state by dideoxy-sequencing of non-WGA DNA of the equivalent tubule cluster pooled from S18 and S22. (E) Further dideoxy-sequencing analysis of tubules with normal (green surround) or immunopositive (blue surround) MAGEA4 appearance close to tubule cluster A performed on non-WGA material pooled from S18 and S22. All immunopositive tubules (blue surround) in this region harbor the *PTPN11* c.181G>T mutation. All analyzed tubules with a normal MAGEA4 appearance (green surround) are mutation-negative. Scale bar: 500  $\mu$ m.



A

Testis: 11-H

Age: 70

Reason for orchidectomy: None provided

Pathology report for this region: Normal

Staining of section 19 with anti-MAGEA4 antibody

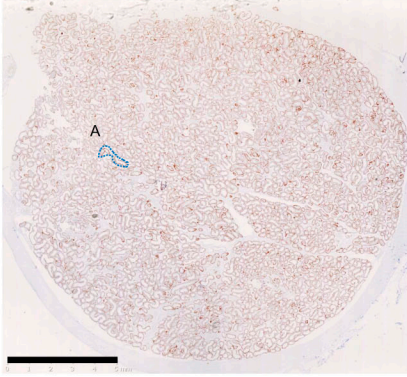

| Section order  |                       |          |
|----------------|-----------------------|----------|
| Section number | Antibody and dilution | Tubule A |
| 01             |                       |          |
| 02             | cFGFR3 1:750          |          |
| 03             | MAGEA4 1:750          |          |
| 04             | LCM slide             |          |
| 05             | LCM slide             |          |
| 06             | LCM slide             |          |
| 07             | MAGEA4 1:750          |          |
| 08             |                       |          |
| 09             | LCM slide             |          |
| 10             | LCM slide             |          |
| 11             | LCM slide             | non-WGA  |
| 12             | pAKT 1:45             |          |
| 13             | MAGEA4 1:750          |          |
| 14             |                       |          |
| 15             | LCM slide             | non-WGA  |
| 16             | LCM slide             | WGA-BC14 |
| 17             | LCM slide             |          |
| 18             |                       |          |
| 19             | MAGEA4 1:750          |          |
| 20             | H&E                   |          |
| 21             | LCM slide             |          |
| 22             | LCM slide             | WGA-BC15 |
| 23             | LCM slide             |          |
| 24             | LCM slide             | WGA-BC16 |
| 25             | MAGEA4 1:750          |          |
| 26             | Ki67 1:160            |          |
| 27             |                       |          |
| 28             |                       |          |
| 29             |                       |          |
| 30             | MAGEA4 1:750          |          |

B

Testis 11-H  
Tubule cluster A

Johnsen score: 6

Johnsen score of  
surrounding normal  
tubules: 8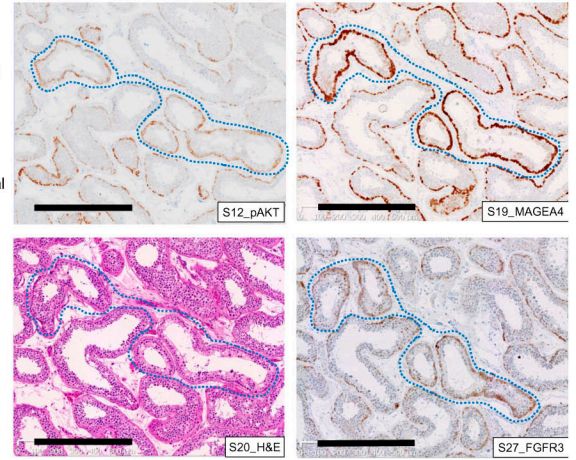

C

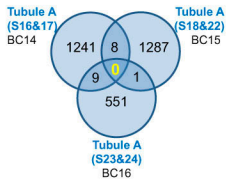

No exonic variant shared by all three replicates

Candidate variants at hotspots in *FGFR2*, *FGFR3*, *HRAS*, *KRAS*, *PTPN11* or *RET*1 non-synonymous variant validated  
1 variant excluded

| Barcodes | Chr | Position  | Ref | Alt | cDNA/protein change       | comment          | EV96500 | 1000G | dbSNP137    | COSMIC v67       | Constitutional DNA |                   | WGA/Tubule DNA |                   | Validated?                      |
|----------|-----|-----------|-----|-----|---------------------------|------------------|---------|-------|-------------|------------------|--------------------|-------------------|----------------|-------------------|---------------------------------|
|          |     |           |     |     |                           |                  |         |       |             |                  | total reads        | variant frequency | total reads    | variant frequency |                                 |
| 15 vs 17 | 10  | 123078988 | T   | C   | FGFR2 c.1019A>G (p.Y340C) | Plummer syndrome | -       | -     | -           | -                | 381                | 0%                | 135            | 16.4%             | Yes - present in non-WGA DNA    |
| 16 vs 17 | 12  | 20380277  | G   | C   | HRAS c.181C>G (p.Q61E)    | Oncogenic        | -       | -     | rs121913238 | CCDS44550 (p=10) | 949                | 0.1%              | 220            | 93.4%             | No - not present in non-WGA DNA |

D

HaloPlex  
*FGFR2* c.1019A>G (p.Y340C)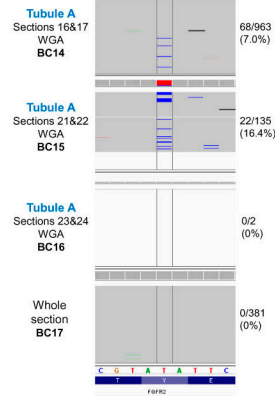Dideoxy-sequencing of non-WGA DNA  
from sections 11&15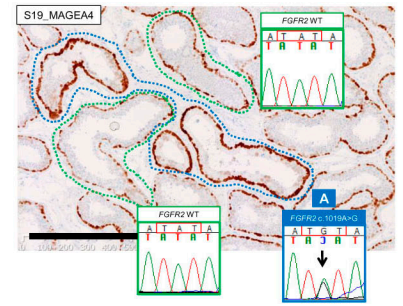

**Fig. S14.** Analysis of Testis 11-H. (A) Low magnification view of the MAGEA4-stained sample, with pathology, serial section order and immunostaining details. The location of the microdissected and HaloPlex-sequenced tubule cluster A is indicated. Scale bar: 5 mm. (B) Detailed view of the staining appearance (pAKT, MAGEA4, H&E and FGFR3) and Johnsen scoring of tubule cluster A. The tubules surrounded by blue dotted lines are the immunopositive tubules that were microdissected and analyzed on adjacent sections. Section numbers (e.g. S12) and staining performed on each section are indicated. Scale bars: 500  $\mu$ m. (C) Number of exonic SNVs and indels identified in the triplicate samples for tubule cluster A but not present in the matched whole section (constitutional) DNA shown in Venn diagram. No exonic variants were common to each of the triplicates. Two candidate variants at known mutational hotspots in *FGFR2* and *KRAS* present in one or two replicates were identified and subsequently screened using non-WGA DNA of the equivalent tubule from an adjacent section. One variant was validated (blue box). (D) A *FGFR2* c.1019A>G (p.Y340C) mutation was identified by HaloPlex sequencing in one of the triplicate WGA DNA samples (viewed in IGV). The variant was present below the 10% calling threshold in BC14 and the region was poorly covered in BC16. The mutation was validated in the heterozygous state by dideoxy-sequencing of non-WGA DNA of the equivalent tubule cluster (blue surround) pooled from S11 and S15. All analyzed tubules with a normal MAGEA4 appearance (green surround) were mutation-negative. Scale bar: 500  $\mu$ m.

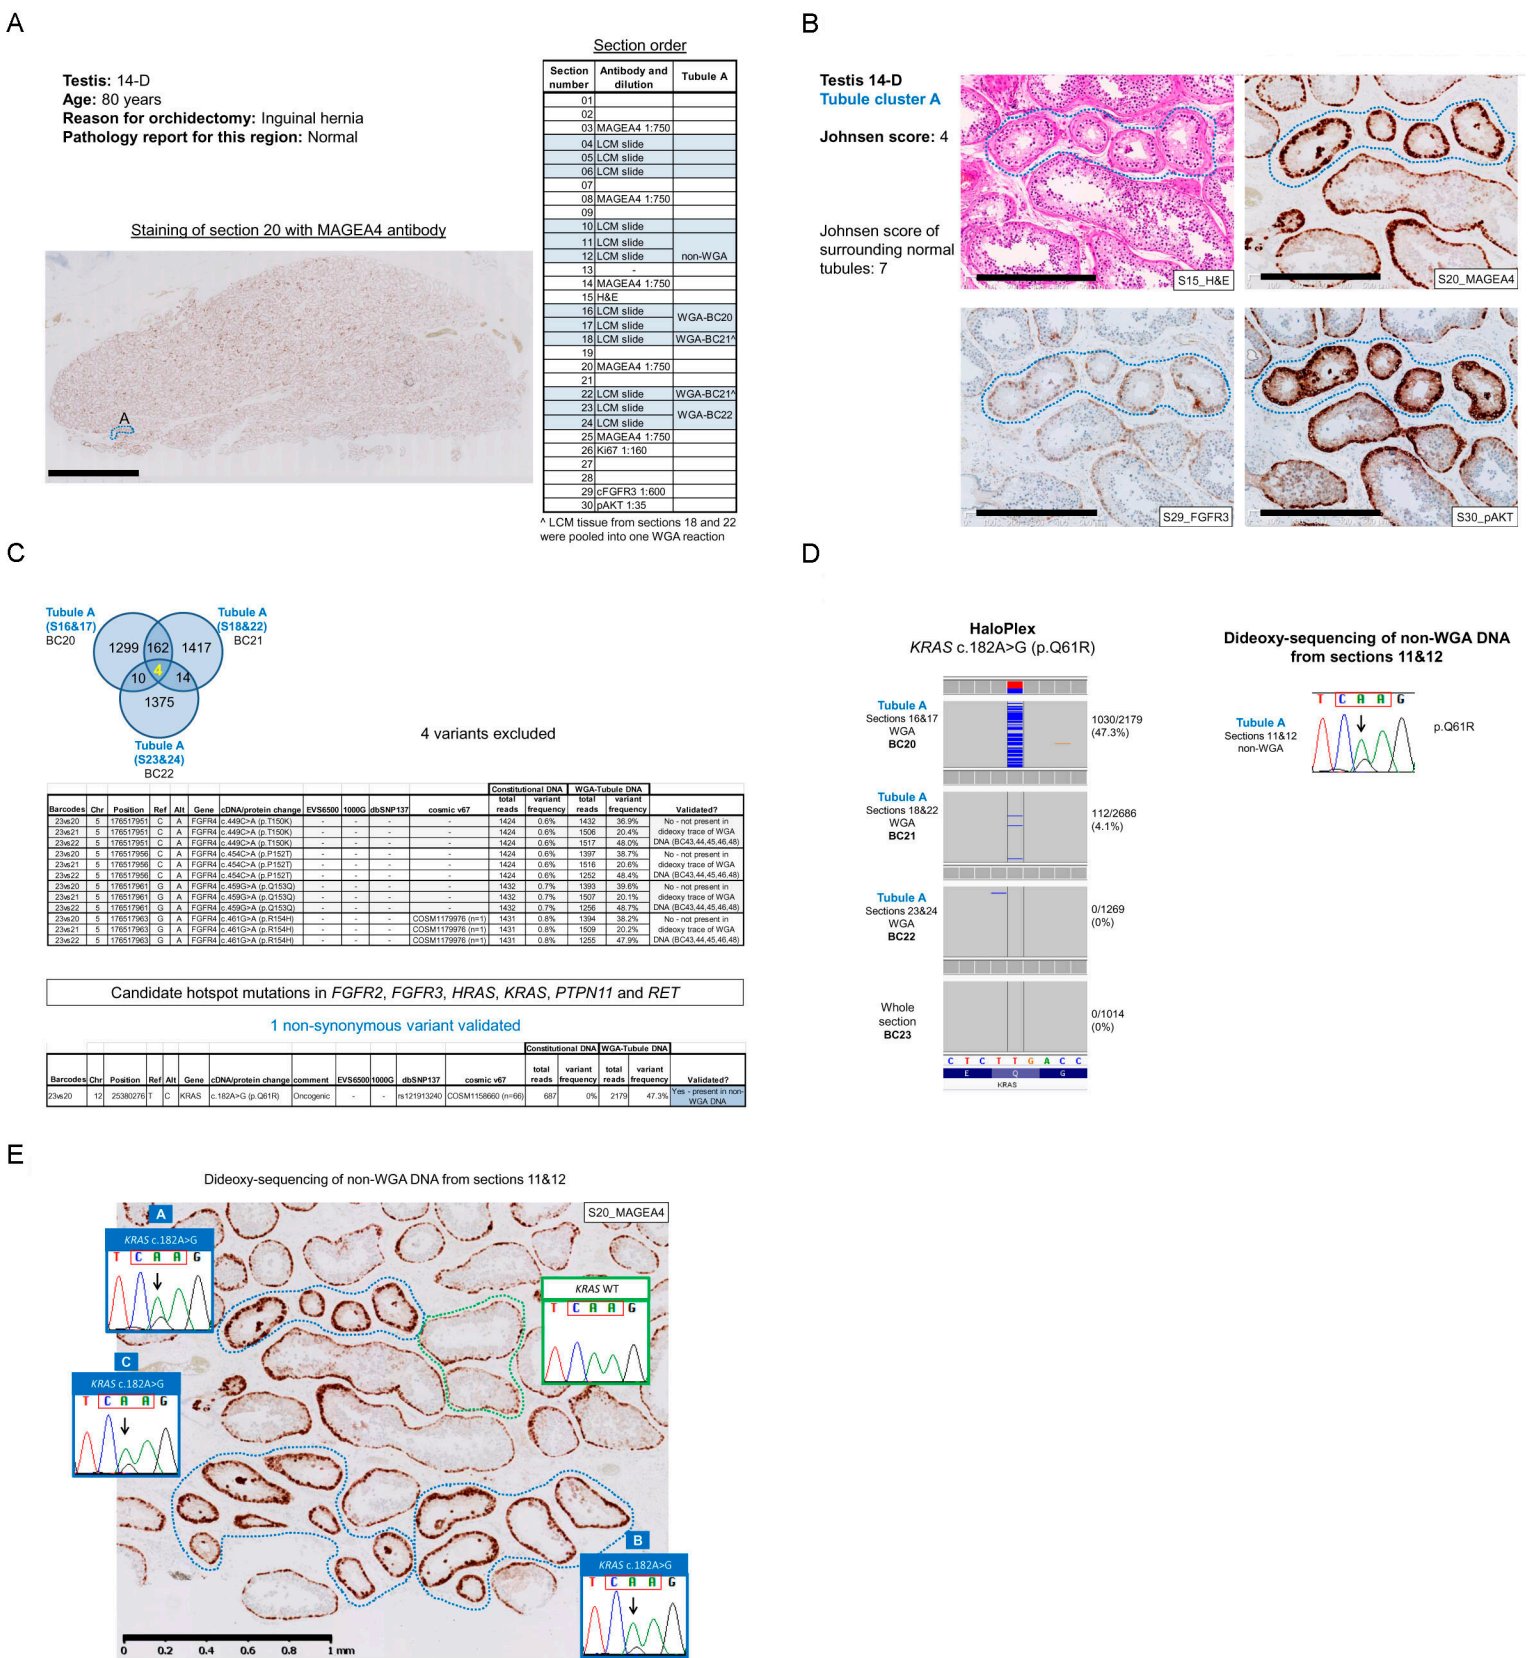

**Fig. 15.** Analysis of Testis 14-D. (A) Low magnification view of the MAGEA4-stained sample, with pathology, serial section order and immunostaining details. The location of the microdissected and HaloPlex-sequenced tubule cluster A is indicated. Scale bar: 5 mm. (B) Detailed view of the staining appearance (H&E, MAGEA4, FGFR3 and pAKT) and Johnsen scoring of tubule cluster A. The tubules surrounded by blue dotted lines are the immunopositive tubules that were microdissected and analyzed on adjacent sections. Section numbers (e.g. S15) and staining performed on each section are indicated. Scale bars: 500  $\mu$ m. (C) Number of exonic SNVs and indels identified in the triplicate samples for tubule cluster A but not present in the matched whole section (constitutional) DNA shown in Venn diagram. Four exonic variants were common to each of the triplicates but all four were demonstrated to be alignment errors in other WGA samples. A single candidate variant at a known mutational hotspot in *KRAS* present in one of the replicates was identified and subsequently validated (blue box). (D) A *KRAS* c.182A>G (p.Q61R) mutation was identified by HaloPlex sequencing in one of the triplicate WGA DNA samples (BC20) (viewed in IGV). The variant was present below the 10% calling threshold in BC21 and was not present in BC22. This mutation was validated in the heterozygous state by dideoxy-sequencing of non-WGA DNA of the equivalent tubule cluster pooled from S11 and S12. (E) Further dideoxy-sequencing analysis of tubules with normal (green surround) or immunopositive (blue surround) MAGEA4 appearance close to tubule cluster A performed on non-WGA material pooled from S11 and S12. All immunopositive tubules (blue surround) in this region harbor the *KRAS* c.182A>G mutation. All analyzed tubules with a normal MAGEA4 appearance (green surround) were mutation-negative. Scale bar: 1 mm.



A

Testis: 12-H \*  
 Age: 71 years  
 Reason for orchidectomy: Inguinal hernia  
 Pathology report for this region: Focal Leydig cell hyperplasia

Staining of section 14 with MAGEA4 antibody

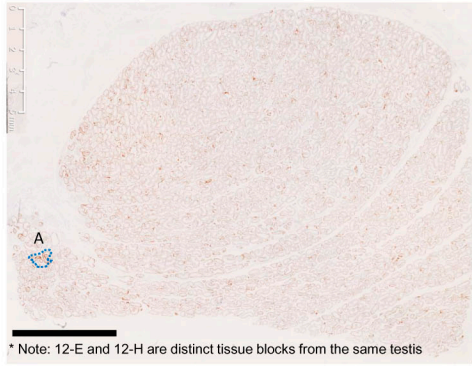

\* Note: 12-E and 12-H are distinct tissue blocks from the same testis

Section order

| Section number | Antibody and dilution | Tubule A  |
|----------------|-----------------------|-----------|
| 01             |                       |           |
| 02             |                       |           |
| 03             | MAGEA4 1:500          |           |
| 04             | LCM slide             |           |
| 05             | LCM slide             |           |
| 06             | LCM slide             |           |
| 07             |                       |           |
| 08             | MAGEA4 1:750          |           |
| 09             |                       |           |
| 10             | LCM slide             | WGA-BC06  |
| 11             | LCM slide             | WGA-BC07* |
| 12             | LCM slide             | WGA-BC07* |
| 13             | -                     |           |
| 14             | MAGEA4 1:750          |           |
| 15             | H&E                   |           |
| 16             | LCM slide             | WGA-BC07* |
| 17             | LCM slide             | WGA-BC08  |
| 18             | LCM slide             |           |
| 19             |                       |           |
| 20             | MAGEA4 1:750          |           |
| 21             |                       |           |
| 22             | LCM slide             | non-WGA   |
| 23             | LCM slide             | non-WGA   |
| 24             | LCM slide             |           |
| 25             | MAGEA4 1:750          |           |
| 26             | Ki67 1:160            |           |
| 27             |                       |           |
| 28             |                       |           |
| 29             | cFGFR3 1:750          |           |
| 30             | pAKT 1:30             |           |

\* LCM tissue from sections 12 and 16 were pooled into one WGA reaction

B

Testis 12-H  
 Tubule cluster A

Johnsen score: 7

Johnsen score of surrounding normal tubules: 10

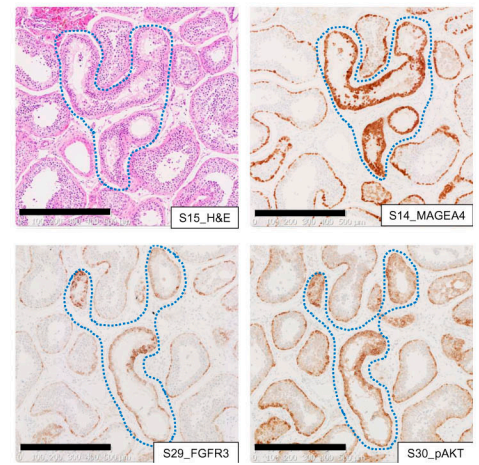

C

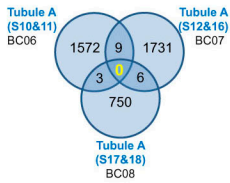

No exonic variant shared by all three replicates

Candidate variants at hotspots in *FGFR2*, *FGFR3*, *HRAS*, *KRAS*, *PTPN11* or *RET*

1 variant excluded

| Barcode | Chr | Position  | Ref | Alt | Gene  | cDNA/protein change | comment            | EVS690 | 1000G | dbSNP137 | COSMIC v47 | Constitutional DNA |                   | WGA-Tubule DNA |                   | Validated?                       |
|---------|-----|-----------|-----|-----|-------|---------------------|--------------------|--------|-------|----------|------------|--------------------|-------------------|----------------|-------------------|----------------------------------|
|         |     |           |     |     |       |                     |                    |        |       |          |            | total reads        | variant frequency | total reads    | variant frequency |                                  |
| 08-w-09 | 10  | 523274788 | C   | T   | FGFR2 | c.1150G>A (p.G384R) | Cysteine>histidine | -      | -     | -        | -          | 2426               | 0.2%              | 9620           | 67.9%             | No - not present in non-WGA DNA. |

**Fig. S16.** Analysis of Testis 12-H. (A) Low magnification view of the MAGEA4-stained sample, with pathology, serial section order and immunostaining details. The location of the microdissected and HaloPlex-sequenced tubule cluster A is indicated. Scale bar: 5 mm. (B) Detailed view of the staining appearance (H&E, MAGEA4, FGFR3 and pAKT) and Johnsen scoring of tubule cluster A. The tubules surrounded by blue dotted lines are the immunopositive tubules that were microdissected and analyzed on adjacent sections. Section numbers (e.g. S15) and staining performed on each section are indicated. Scale bars: 500  $\mu$ m. (C) Number of exonic SNVs and indels identified in the triplicate samples for tubule cluster A but not present in the matched whole section (constitutional) DNA shown in Venn diagram. No exonic variants were common to each of the triplicates. One candidate variant at a known mutational hotspot in *FGFR2* present in a single replicate was identified, but was excluded as it was not present in non-WGA DNA of the equivalent tubule pooled from S22 and S23.



**A** **Johnsen scoring system (main text ref<sup>39</sup>)**

|                                                   |
|---------------------------------------------------|
| 10 = Full spermatogenesis                         |
| 9 = Many late spermatids, disorganised epithelium |
| 8 = Few late spermatids                           |
| 7 = No late spermatids, many early spermatids     |
| 6 = No late spermatids, few early spermatids      |
| 5 = No spermatids, many spermatocytes             |
| 4 = No spermatids, few spermatocytes              |
| 3 = Spermatogonia only                            |
| 2 = No germinal cells, Sertoli cells only         |
| 1 = No seminiferous epithelium                    |

**B**

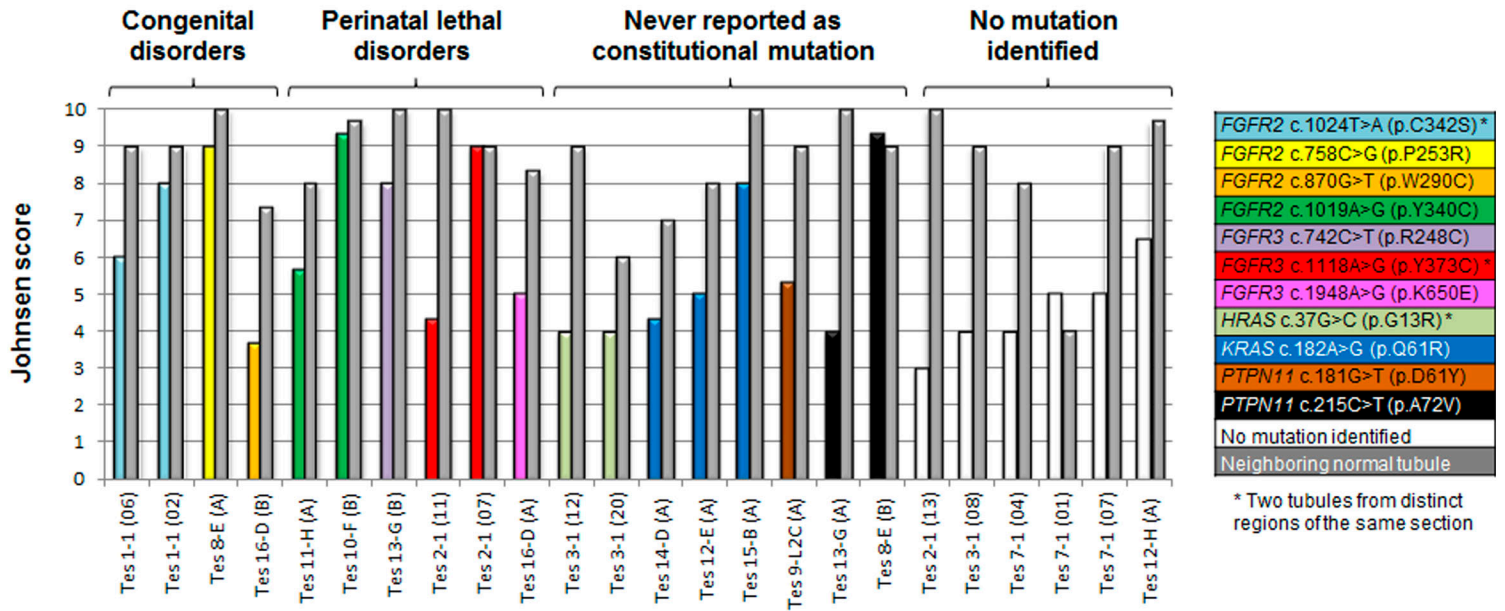

**Fig. S17.** Analysis of spermatogenesis in immunopositive and neighbouring normal tubules. (A) Details of the Johnsen scoring system for analysis of spermatogenesis. (B) Johnsen scores of immunopositive tubules (coloured bars as indicated) and neighbouring normal tubules (grey bars). Pairwise analysis of the data in (B) is presented in Fig. 3.

A

Testis: 17-2E

Age: 90 years

Reason for orchidectomy: Inguinal hernia

Pathology report for this region: long standing ischaemia of the seminiferous tubules secondary to strangulation in inguinal hernia. Severe atrophy of seminiferous tubules. Vascular congestion.

Staining of section 08 with MAGEA4 antibody

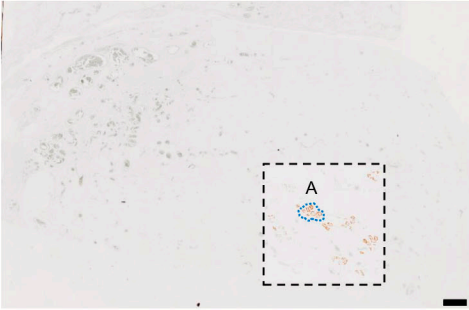

Section order

| Section number | Antibody and dilution | Tubule A |
|----------------|-----------------------|----------|
| 01             |                       |          |
| 02             |                       |          |
| 03             | MAGEA4 1:750          |          |
| 04             | LCM slide             |          |
| 05             | LCM slide             |          |
| 06             | LCM slide             | non-WGA  |
| 07             |                       |          |
| 08             | MAGEA4 1:750          |          |
| 09             |                       |          |
| 10             | LCM slide             | WGA-PGM  |
| 11             | LCM slide             | WGA-PGM  |
| 12             | LCM slide             | WGA-PGM* |
| 13             |                       |          |
| 14             | MAGEA4 1:750          |          |
| 15             |                       |          |
| 16             | LCM slide             | WGA-PGM* |
| 17             | LCM slide             | WGA-PGM  |
| 18             | LCM slide             | WGA-PGM  |
| 19             |                       |          |
| 20             | MAGEA4 1:750          |          |
| 21             |                       |          |
| 22             | LCM slide             |          |
| 23             | LCM slide             |          |
| 24             | LCM slide             |          |
| 25             | MAGEA4 1:750          |          |
| 26             | cFGFR3 1:750          |          |
| 27             | pAKT 1:45             |          |
| 28             | H&E                   |          |
| 29             | K67 1:160             |          |
| 30             | pAKT 1:35             |          |

\* LCM tissue from sections 12 and 16 were pooled into one WGA reaction

B

Testis 17-2E

Tubule cluster A

Johnsen score: 3

Johnsen score of surrounding normal tubules: 8

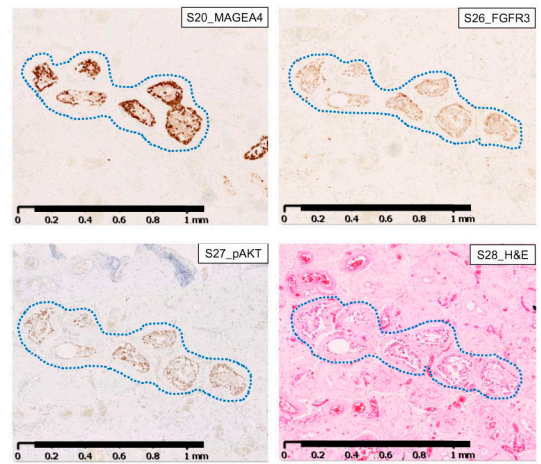

C

Targeted PGM screen  
FGFR3 c.1948A>G (p.K650E)

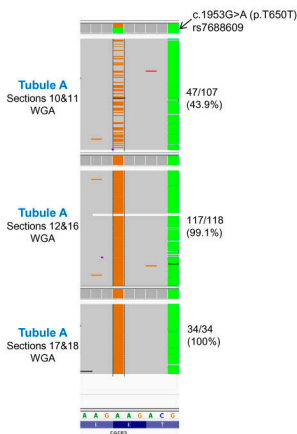

Dideoxy-sequencing of non-WGA DNA  
from sections 05&06 and 10&11

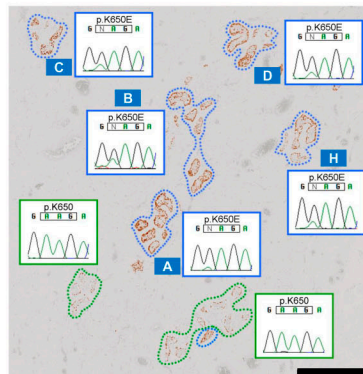

Note: FGFR3 c.1948A>G mutations are apparently homozygous (wildtype somatic Sertoli cells likely to account for the reference "A" peak)

**Fig. S18.** Analysis of Testis 17-2E. (A) Low magnification view of the MAGEA4-stained sample, with pathology, serial section order and immunostaining details. Tubules with spermatogonia (identified by brown stain) are rare and are only present in the outlined box. Scale bar: 1 mm. (B) Detailed view of the staining appearance (MAGEA4, FGFR3, pAKT and H&E) and Johnsen scoring of tubule cluster A. The tubules surrounded by blue dotted lines are the immunopositive tubules that were microdissected and analyzed on adjacent sections. Section numbers (e.g. S20) and staining performed on each section are indicated. Scale bars: 1 mm. (C, left panel) Targeted PGM resequencing of PCR-amplified WGA DNA from the triplicate samples identified the *FGFR3* c.1948A>G (p.K650E) mutation in tubule cluster A from all triplicates. This individual is also homozygous for the non-reference A allele for SNP rs7688609 at cDNA position 1953. (c, right panel) Dideoxy-sequencing analysis of tubules with normal (green surround) or immunopositive (blue surround) MAGEA4 appearance close to tubule cluster A performed on non-WGA material pooled from S05, 06, S10 and S11. All of the strongly-immunopositive tubules (blue surround) in these regions are apparently homozygous for the *FGFR3* c.1948A>G mutation (wildtype somatic Sertoli cells within the tubule likely account for the minority reference "A" peak). The *FGFR3* c.1948A>G mutation was not detected in the few neighboring tubules with normal MAGEA4-staining appearance (green surround). Scale bar: 1 mm. Images in (A) and (C) are also shown in Fig. 4.
